# Supplementary material for: Finnish study of intraoperative irrigation versus drain alone after evacuation of chronic subdural haematoma (FINISH): a study protocol for a multicentre randomised controlled trial
Source: PubMed Central journal article supplement — BMJ Open. 2020 Jun 21;10(6):e038275. doi: 10.1136/bmjopen-2020-038275 (PMC7311024; doi:10.1136/bmjopen-2020-038275), 2020-06-21
Supplement: bmjopen-2020-038275.draft_revisions.pdf [file bmjopen-2020-038275.draft_revisions.pdf]

# BMJ Open

BMJ Open is committed to open peer review. As part of this commitment we make the peer review history of every article we publish publicly available.

When an article is published we post the peer reviewers' comments and the authors' responses online. We also post the versions of the paper that were used during peer review. These are the versions that the peer review comments apply to.

The versions of the paper that follow are the versions that were submitted during the peer review process. They are not the versions of record or the final published versions. They should not be cited or distributed as the published version of this manuscript.

BMJ Open is an open access journal and the full, final, typeset and author-corrected version of record of the manuscript is available on our site with no access controls, subscription charges or pay-per-view fees (<http://bmjopen.bmj.com>).

If you have any questions on BMJ Open's open peer review process please email [info.bmjopen@bmj.com](mailto:info.bmjopen@bmj.com)

# BMJ Open

## The Finnish study of intraoperative irrigation versus drain alone after evacuation of chronic subdural haematoma (FINISH): a study protocol for a multicentre randomized controlled trial

|                               |                                                                                                                                                                                                                                                                                                                                                                                                                                                                                                                                                                                                                                                                                                                                                                                                                                                                                                                                                                                                                                                                                                                                                                                                                                                                                                                                                                                                                                                                                                                                                                                                                                                                                                                                                                                                                                                                                                                                                                                                                               |
|-------------------------------|-------------------------------------------------------------------------------------------------------------------------------------------------------------------------------------------------------------------------------------------------------------------------------------------------------------------------------------------------------------------------------------------------------------------------------------------------------------------------------------------------------------------------------------------------------------------------------------------------------------------------------------------------------------------------------------------------------------------------------------------------------------------------------------------------------------------------------------------------------------------------------------------------------------------------------------------------------------------------------------------------------------------------------------------------------------------------------------------------------------------------------------------------------------------------------------------------------------------------------------------------------------------------------------------------------------------------------------------------------------------------------------------------------------------------------------------------------------------------------------------------------------------------------------------------------------------------------------------------------------------------------------------------------------------------------------------------------------------------------------------------------------------------------------------------------------------------------------------------------------------------------------------------------------------------------------------------------------------------------------------------------------------------------|
| Journal:                      | <i>BMJ Open</i>                                                                                                                                                                                                                                                                                                                                                                                                                                                                                                                                                                                                                                                                                                                                                                                                                                                                                                                                                                                                                                                                                                                                                                                                                                                                                                                                                                                                                                                                                                                                                                                                                                                                                                                                                                                                                                                                                                                                                                                                               |
| Manuscript ID                 | bmjopen-2020-038275                                                                                                                                                                                                                                                                                                                                                                                                                                                                                                                                                                                                                                                                                                                                                                                                                                                                                                                                                                                                                                                                                                                                                                                                                                                                                                                                                                                                                                                                                                                                                                                                                                                                                                                                                                                                                                                                                                                                                                                                           |
| Article Type:                 | Protocol                                                                                                                                                                                                                                                                                                                                                                                                                                                                                                                                                                                                                                                                                                                                                                                                                                                                                                                                                                                                                                                                                                                                                                                                                                                                                                                                                                                                                                                                                                                                                                                                                                                                                                                                                                                                                                                                                                                                                                                                                      |
| Date Submitted by the Author: | 05-Mar-2020                                                                                                                                                                                                                                                                                                                                                                                                                                                                                                                                                                                                                                                                                                                                                                                                                                                                                                                                                                                                                                                                                                                                                                                                                                                                                                                                                                                                                                                                                                                                                                                                                                                                                                                                                                                                                                                                                                                                                                                                                   |
| Complete List of Authors:     | <p>Tommiska, Pihla; Helsinki University Central Hospital, Department of Neurosurgery; University of Helsinki<br/> Rahul, Raj; Helsinki University Central Hospital, Department of Neurosurgery; University of Helsinki<br/> Schwartz, Christoph; University Hospital Salzburg, Paracelsus Medical University, Department of Neurosurgery; Helsinki University Central Hospital, Neurosurgery<br/> Kivisaari, Riku; Helsinki University Central Hospital, Department of Neurosurgery; University of Helsinki<br/> Luostarinen, T; Helsinki University Central Hospital, Department of Anesthesiology and Intensive Care; University of Helsinki<br/> Satopää, Jarno; Helsinki University Central Hospital, Department of Neurosurgery; University of Helsinki<br/> Taimela, Simo; Helsinki University Central Hospital, Orthopedics and Traumatology; University of Helsinki, Finnish Centre for Evidence-Based Orthopedics (FICEBO)<br/> Jarvinen, Teppo; Helsinki University Central Hospital, Department of Orthopaedics and Traumatology; University of Helsinki, Finland and Finnish Centre for Evidence-Based Orthopedics (FICEBO)<br/> Ranstam, Jonas; Lunds Universitet, Clinical sciences<br/> Frantzen, Janek; Turun Yliopistollinen Keskussairaala, Department of Neurosurgery; Helsinki University Central Hospital<br/> Posti, Jussi; Turku University Hospital, Department of Neurosurgery and Brain Injury Centre<br/> Luoto, Teemu M.; Tampere University Hospital, Department of Neurosurgery; Tampere University<br/> Leinonen, Ville; Kuopio University Hospital, Department of Neurosurgery; University of Eastern Finland School of Medicine<br/> Tetri, Sami; Oulu University Hospital, Department of Neurosurgery; Oulu University Faculty of Medicine<br/> Koivisto, Timo ; Kuopio University Hospital, Department of Neurosurgery; University of Eastern Finland School of Medicine<br/> Lönnrot, Kimmo; Helsinki University Central Hospital, Department of Neurosurgery; University of Helsinki</p> |
| Keywords:                     | NEUROSURGERY, Neurological injury < NEUROLOGY, SURGERY                                                                                                                                                                                                                                                                                                                                                                                                                                                                                                                                                                                                                                                                                                                                                                                                                                                                                                                                                                                                                                                                                                                                                                                                                                                                                                                                                                                                                                                                                                                                                                                                                                                                                                                                                                                                                                                                                                                                                                        |
|                               |                                                                                                                                                                                                                                                                                                                                                                                                                                                                                                                                                                                                                                                                                                                                                                                                                                                                                                                                                                                                                                                                                                                                                                                                                                                                                                                                                                                                                                                                                                                                                                                                                                                                                                                                                                                                                                                                                                                                                                                                                               |

1  
2  
3  
4  
5  
6  
7  
8  
9  
10  
11  
12  
13  
14  
15  
16  
17  
18  
19  
20  
21  
22  
23  
24  
25  
26  
27  
28  
29  
30  
31  
32  
33  
34  
35  
36  
37  
38  
39  
40  
41  
42  
43  
44  
45  
46  
47  
48  
49  
50  
51  
52  
53  
54  
55  
56  
57  
58  
59  
60

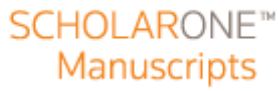

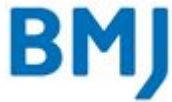

I, the Submitting Author has the right to grant and does grant on behalf of all authors of the Work (as defined in the below author licence), an exclusive licence and/or a non-exclusive licence for contributions from authors who are: i) UK Crown employees; ii) where BMJ has agreed a CC-BY licence shall apply, and/or iii) in accordance with the terms applicable for US Federal Government officers or employees acting as part of their official duties; on a worldwide, perpetual, irrevocable, royalty-free basis to BMJ Publishing Group Ltd ("BMJ") its licensees and where the relevant Journal is co-owned by BMJ to the co-owners of the Journal, to publish the Work in this journal and any other BMJ products and to exploit all rights, as set out in our [licence](#).

The Submitting Author accepts and understands that any supply made under these terms is made by BMJ to the Submitting Author unless you are acting as an employee on behalf of your employer or a postgraduate student of an affiliated institution which is paying any applicable article publishing charge ("APC") for Open Access articles. Where the Submitting Author wishes to make the Work available on an Open Access basis (and intends to pay the relevant APC), the terms of reuse of such Open Access shall be governed by a Creative Commons licence – details of these licences and which [Creative Commons](#) licence will apply to this Work are set out in our licence referred to above.

Other than as permitted in any relevant BMJ Author's Self Archiving Policies, I confirm this Work has not been accepted for publication elsewhere, is not being considered for publication elsewhere and does not duplicate material already published. I confirm all authors consent to publication of this Work and authorise the granting of this licence.

# STUDY PROTOCOL

**TITLE:** The Finnish study of intraoperative irrigation versus drain alone after evacuation of chronic subdural haematoma (FINISH): a study protocol for a multicentre randomized controlled trial

**AUTHORS:** Pihla Tommiska\*<sup>1</sup>, Rahul Raj\*<sup>1</sup>, Christoph Schwartz<sup>1,2</sup>, Riku Kivisaari<sup>1</sup>, Teemu Luostarinen<sup>3</sup>, Jarno Satopää<sup>1</sup>, Simo Taimela<sup>4,5</sup>, Teppo Järvinen<sup>4,5</sup>, Jonas Ranstam<sup>6</sup>, Janek Frantzén<sup>1,7</sup>, Jussi Posti<sup>7</sup>, Teemu Luoto<sup>8</sup>, Ville Leinonen<sup>9,10</sup>, Sami Tetri<sup>10</sup>, Timo Koivisto<sup>9</sup>, Kimmo Lönnrot<sup>1,4</sup>

- 1) Department of Neurosurgery, University of Helsinki and Helsinki University Hospital, Helsinki, Finland
- 2) Department of Neurosurgery, University Hospital Salzburg, Paracelsus Medical University, Salzburg, Austria
- 3) Division of Anaesthesiology, Department of Anaesthesiology, Intensive Care and Pain Medicine, Helsinki University Hospital, Helsinki, Finland
- 4) Finnish Centre for Evidence-Based Orthopedics (FICEBO), University of Helsinki and Helsinki University Hospital, Helsinki, Finland
- 5) Department of Orthopaedics and Traumatology, University of Helsinki and Helsinki University Hospital, Helsinki, Finland
- 6) Department of Clinical Sciences, Lund University, Lund, Sweden
- 7) Division of Clinical Neurosciences, Department of Neurosurgery and Turku Brain Centre, Turku University Hospital and University of Turku, Turku, Finland
- 8) Department of Neurosurgery, Tampere University Hospital and Tampere University, Tampere, Finland
- 9) Department of Neurosurgery, Kuopio University Hospital and University of Eastern Finland, Kuopio, Finland
- 10) Unit of Clinical Neuroscience, Neurosurgery, University of Oulu and Medical Research Center, Oulu, Finland

\*equal contribution

**Correspondence:**

Rahul Raj, MD, PhD

Department of Neurosurgery

University of Helsinki and Helsinki University Hospital

Topeliuksenkatu 5, P.B. 266, 00029 HUS, Helsinki, Finland

Phone: +358504272516

Email: rahul.raj@hus.fi

**ClinicalTrial registration number:** NCT04203550

**Keywords:** chronic subdural haematoma, surgical evacuation, recurrence, irrigation fluid

**Word count** (excluding title page, abstract, references, figures and tables): 4461

**Full author list:**

**Pihla Tommiska**, BM, Department of Neurosurgery, University of Helsinki and Helsinki University Hospital, Helsinki, Finland, [pihla.tommiska@helsinki.fi](mailto:pihla.tommiska@helsinki.fi)

**Rahul Raj**, MD, PhD, Department of Neurosurgery, University of Helsinki and Helsinki University Hospital, Helsinki, Finland, [rahul.raj@hus.fi](mailto:rahul.raj@hus.fi)

**Christoph Schwartz**, MD, PhD, Department of Neurosurgery, University of Helsinki and Helsinki University Hospital, Helsinki, Finland and Department of Neurosurgery, University Hospital Salzburg, Paracelsus Medical University, Salzburg, Austria, [c.schwartz@salk.at](mailto:c.schwartz@salk.at)

**Riku Kivisaari**, MD, PhD, Department of Neurosurgery, University of Helsinki and Helsinki University Hospital, Helsinki, Finland, [riku.kivisaari@hus.fi](mailto:riku.kivisaari@hus.fi)

**Teemu Luostarinen**, MD, PhD, Division of Anaesthesiology, Department of Anaesthesiology, Intensive Care and Pain Medicine, Helsinki University Hospital, Helsinki, Finland.  
[teemu.luostarinen@hus.fi](mailto:teemu.luostarinen@hus.fi)

**Jarno Satopää**, MD, PhD, Department of Neurosurgery, University of Helsinki and Helsinki University Hospital, Helsinki, Finland, [jarno.satopaa@hus.fi](mailto:jarno.satopaa@hus.fi)

**Simo Taimela**, MD, PhD, Department of Orthopaedics and Traumatology, University of Helsinki and Helsinki University Hospital, Helsinki, Finland and Finnish Centre for Evidence-Based Orthopedics (FICEBO), University of Helsinki and Helsinki University Hospital, Helsinki, Finland,  
[simo.taimela@helsinki.fi](mailto:simo.taimela@helsinki.fi)

**Teppo Järvinen**, MD, PhD, Department of Orthopaedics and Traumatology, University of Helsinki and Helsinki University Hospital, Helsinki, Finland and Finnish Centre for Evidence-Based Orthopedics (FICEBO), University of Helsinki and Helsinki University Hospital, Helsinki, Finland,  
[teppo.jarvinen@helsinki.fi](mailto:teppo.jarvinen@helsinki.fi)

**Jonas Ranstam**, PhD, Department of Clinical Sciences, Lund University, Lund, Sweden,  
[jonas.ranstam@mdas.se](mailto:jonas.ranstam@mdas.se)

**Janek Frantzén**, MD, PhD, Department of Neurosurgery, University of Helsinki and Helsinki University Hospital, Helsinki, Finland and Division of Clinical Neurosciences, Department of Neurosurgery and Turku Brain Centre, Turku University Hospital and University of Turku, Turku, Finland, [janek.frantzen@tyks.fi](mailto:janek.frantzen@tyks.fi)

**Jussi Posti**, MD, PhD, Division of Clinical Neurosciences, Department of Neurosurgery and Turku Brain Centre, Turku University Hospital and University of Turku, Turku, Finland, [jussi.posti@utu.fi](mailto:jussi.posti@utu.fi)

**Teemu Luoto**, MD, PhD, Department of Neurosurgery, Tampere University Hospital and Tampere University, Tampere, Finland, [teemu.luoto@pshp.fi](mailto:teemu.luoto@pshp.fi)

1  
2  
3 **Ville Leinonen**, MD, PhD, Department of Neurosurgery, Kuopio University Hospital and University  
4 of Eastern Finland, Kuopio, Finland and Unit of Clinical Neuroscience, Neurosurgery, University of  
5 Oulu and Medical Research Center, Oulu, Finland, [ville.leinonen@kuh.fi](mailto:ville.leinonen@kuh.fi)  
6  
7

8 **Sami Tetri**, MD, PhD, Unit of Clinical Neuroscience, Neurosurgery, University of Oulu and Medical  
9 Research Center, Oulu, Finland, [sami.tetri@ppshp.fi](mailto:sami.tetri@ppshp.fi)  
10

11 **Timo Koivisto**, MD, PhD, Department of Neurosurgery, Kuopio University Hospital and University of  
12 Eastern Finland, Kuopio, Finland, [timo.koivisto@kuh.fi](mailto:timo.koivisto@kuh.fi)  
13  
14

15 **Kimmo Lönnrot**, MD, PhD, Department of Neurosurgery, University of Helsinki and Helsinki  
16 University Hospital, Helsinki, Finland and Finnish Centre for Evidence-Based Orthopedics (FICEBO),  
17 University of Helsinki and Helsinki University Hospital, Helsinki, Finland, [kimmo.lonnrot@hus.fi](mailto:kimmo.lonnrot@hus.fi)  
18  
19  
20  
21  
22  
23  
24  
25  
26  
27  
28  
29  
30  
31  
32  
33  
34  
35  
36  
37  
38  
39  
40  
41  
42  
43  
44  
45  
46  
47  
48  
49  
50  
51  
52  
53  
54  
55  
56  
57  
58  
59  
60

| Data category                                 | Information                                                                                                                                                                                         |
|-----------------------------------------------|-----------------------------------------------------------------------------------------------------------------------------------------------------------------------------------------------------|
| Primary registry and trial identifying number | ClinicalTrials.gov<br>NCT04203550                                                                                                                                                                   |
| Date of registration in primary registry      | December 18, 2019                                                                                                                                                                                   |
| Secondary identifying numbers                 | N/A                                                                                                                                                                                                 |
| Source(s) of monetary or material support     | State funding for University-level health research (Helsinki University Hospitals), Finska Läkaresällskapet, Medicinska Understödsföreningen Liv & Hälsa                                            |
| Primary sponsor                               | Helsinki University Hospital                                                                                                                                                                        |
| Secondary sponsor(s)                          | N/A                                                                                                                                                                                                 |
| Contact for public queries                    | Kimmo Lönnrot, MD, PhD; email: kimmo.lonnrot@hus.fi; address: Töölö Hospital, Topeliuksenkatu 5, PB 266, 00029 HUS, Finland; phone: +358-50-427-0270                                                |
| Contact for scientific queries                | Kimmo Lönnrot, MD, PhD; email: kimmo.lonnrot@hus.fi; address: Töölö Hospital, Topeliuksenkatu 5, PB 266, 00029 HUS, Finland; phone: +358-50-427-0270                                                |
| Public title                                  | Irrigation or no irrigation for surgery of chronic subdural haematoma (FINISH)                                                                                                                      |
| Scientific title                              | The Finnish study of Intraoperative Irrigation versus drain alone after evacuation of chronic Subdural Haematoma (FINISH): A study protocol for a multicentre randomised controlled trial           |
| Countries of recruitment                      | Finland                                                                                                                                                                                             |
| Health condition(s) or problem(s) studied     | Chronic subdural haematoma (CSDH)                                                                                                                                                                   |
| Intervention(s)                               | Active comparator: Irrigation (i.e. the subdural space is irrigated by repeated rinsing with body temperature saline solution with a syringe and blunt needle until surgeon considers exudate to be |



| Data category                        | Information                                                                                                                                                                                                                                                                                                                                                                                                                                                                                                                                                                                                                                                                                                                                                                                                                                                                                                                                                                                                                                                                                                                                                                                                                                                                                                                                                                                                                                                                                                                                                                                                                                                                                                                  |
|--------------------------------------|------------------------------------------------------------------------------------------------------------------------------------------------------------------------------------------------------------------------------------------------------------------------------------------------------------------------------------------------------------------------------------------------------------------------------------------------------------------------------------------------------------------------------------------------------------------------------------------------------------------------------------------------------------------------------------------------------------------------------------------------------------------------------------------------------------------------------------------------------------------------------------------------------------------------------------------------------------------------------------------------------------------------------------------------------------------------------------------------------------------------------------------------------------------------------------------------------------------------------------------------------------------------------------------------------------------------------------------------------------------------------------------------------------------------------------------------------------------------------------------------------------------------------------------------------------------------------------------------------------------------------------------------------------------------------------------------------------------------------|
|                                      | <p>clear. The minimum volume of irrigation is 200 ml per operated side. A subdural drain is inserted 3–5 cm underneath the skull and parallel to it and kept as a passive drain for 48 hours)</p> <p>Experimental: No irrigation (i.e. after a small incision of the dura, a subdural drain is inserted 3–5 cm underneath the skull and parallel to it and kept as a passive drain for 48 hours)</p>                                                                                                                                                                                                                                                                                                                                                                                                                                                                                                                                                                                                                                                                                                                                                                                                                                                                                                                                                                                                                                                                                                                                                                                                                                                                                                                         |
| Key inclusion and exclusion criteria | <p>Ages eligible for study: ≥18 years<br/>Sexes eligible for study: All<br/>Accepts healthy volunteers: No</p> <p>Inclusion criteria:</p> <ul style="list-style-type: none"> <li>- Patients with a symptomatic unilateral or bilateral CSDH requiring burr-hole evacuation</li> <li>- Predominantly hypodense or isodense on imaging (CT/MRI)</li> <li>- Clinical symptoms correlating with CSDH</li> <li>- Patients with bilaterally operated CSDHs will be treated with the same protocol on both sides and analysed as a single study participant</li> </ul> <p>Exclusion criteria:</p> <ul style="list-style-type: none"> <li>- CSDH requiring surgical treatment other than burr-hole evacuation (e.g. craniotomy)</li> <li>- CSDH in a patient who has a cerebrospinal fluid shunt</li> <li>- Patients who have previously undergone any intracranial surgery</li> <li>- Comatose patients (GCS 8 or lower) with absent motor responses to painful stimuli; decerebrate or decorticate posturing</li> <li>- Patient's postoperative cooperation is suspected to be insufficient for drain usage (i.e. disoriented or semiconscious patient)</li> <li>- Patient has a haematogenic malignancy that has been actively treated within the previous five years</li> <li>- Patient has a central nervous system tumour or malignancy</li> <li>- Patient has an acute infection requiring antibiotic treatment</li> <li>- Patient has a high risk of life-threatening thrombosis (e.g. recent coronary stent, intracranial stent, recent pulmonary embolism, low pressure cardiac valve replacement [mitral- or tricuspid valve replacement]) and discontinuation of antithrombotic medication is not recommended</li> </ul> |
| Study type                           | <p>Prospective, randomised, controlled, parallel group, non-inferiority trial</p> <p>Allocation: Randomised</p> <p>Intervention model: Parallel assignment</p>                                                                                                                                                                                                                                                                                                                                                                                                                                                                                                                                                                                                                                                                                                                                                                                                                                                                                                                                                                                                                                                                                                                                                                                                                                                                                                                                                                                                                                                                                                                                                               |

| Data category           | Information                                                                                                                                                                                                                                             |
|-------------------------|---------------------------------------------------------------------------------------------------------------------------------------------------------------------------------------------------------------------------------------------------------|
|                         | <p>Intervention model description: Prospective, randomised, controlled, parallel group, non-inferiority trial</p> <p>Masking: Quadruple (participant, care provider, investigator, outcomes assessor)</p> <p>Primary purpose: Treatment</p>             |
| Date of first enrolment | January 2020                                                                                                                                                                                                                                            |
| Target sample size      | 540 participants                                                                                                                                                                                                                                        |
| Recruitment status      | Recruiting                                                                                                                                                                                                                                              |
| Primary outcome(s)      | Rate of reoperations of ipsilateral chronic subdural hematoma (time frame: 6 months from randomization)                                                                                                                                                 |
| Key secondary outcomes  | Change of Modified Rankin Scale (time frame: 6 months), rate of mortality (time frame: 6 months), duration of operation, hospital length of stay, rate of adverse events (time frame: 6 months), change in volume of CSDH between baseline and 2 months |

## ABSTRACT

**Introduction:** Chronic subdural haematomas (CSDHs) are one of the most common neurosurgical conditions. The goal of surgery is to alleviate symptoms and minimize the risk of symptomatic recurrences. In the past, re-operation rates as high as 20–30% were described for CSDH recurrences. However, following the introduction of subdural drainage, re-operation rates dropped to approximately 10%. The standard surgical technique includes burr-hole craniostomy, followed by intraoperative irrigation and placement of subdural drainage. Yet, the role of intraoperative irrigation has not been established. If there is no difference in recurrence rates between intraoperative irrigation and no irrigation, CSDH surgery could be carried out faster and more safely by omitting the step of irrigation. The aim of this multicentre randomised controlled trial is to study whether no intraoperative irrigation and subdural drainage results in non-inferior outcome compared to intraoperative irrigation and subdural drainage following burr-hole craniostomy of CSDH.

**Methods and Analysis:** This is a prospective, randomised, controlled, parallel group, non-inferiority multicentre trial comparing single burr-hole evacuation of CSDH with intraoperative irrigation and evacuation of CSDH without irrigation. In both groups, a passive subdural drain is used for 48 hours as a standard of treatment. The primary outcome is symptomatic CSDH recurrence requiring re-operation within six months. The predefined non-inferiority margin for the primary outcome is 7.5%. To achieve a 2.5% level of significance and 80% power we will randomise 270 patients per group. Secondary outcomes include modified Rankin Scale, rate of mortality, duration of operation, length of hospital stay, adverse events, and change in volume of CSDH.

**Ethics and Dissemination:** The study was approved by the institutional review board of the Helsinki and Uusimaa Hospital District (HUS/3035/2019 §238) and duly registered at ClinicalTrials.gov. We will disseminate the findings of this study through peer-reviewed publications and conference presentations.

**Trial Registration Number:** NCT04203550

## STRENGTHS AND LIMITATIONS OF THIS STUDY

- This is a multicentre nationwide prospective randomised controlled trial, with a pragmatic trial design to increase generalizability.
- The study was designed in collaboration with patient organisation experts.
- The health care system in Finland facilitates the follow-up of patients (particularly with respect to our primary outcome, symptomatic CSDH requiring reoperation) as CSDH surgery is centralized to the five neurosurgical departments participating in the trial.
- Although the surgeon performing the surgery obviously cannot be blinded to the group assignment, we have tried to maintain the masking of the treatment allocation by not disclosing it in the health care records.

## INTRODUCTION

Chronic subdural haematoma (CSDH) is the most common type of intracranial haemorrhage and one of the most common clinical diagnoses necessitating neurosurgical treatment. CSDHs are typically caused by minor head trauma and consecutive tearing of bridging veins, leading to a haemorrhage in between the dura mater and the arachnoid membrane. The delay in the actual diagnosis of CSDH can be quite substantial due to the difficulty of the diagnosis in the early phase when neurological symptoms – such as progressive headache, mental deterioration or confusion, or deterioration of the patient's overall health – are quite unspecific. However, when the disease progresses and causes more direct compression to the underlying brain tissue, more specific progressive neurological signs ensue, including motor and sensory deficits, dysphasia and epileptic seizures, and the diagnosis becomes more evident. If left untreated, CSDH may also lead to loss of consciousness or even death. The definite diagnosis of CSDH is most commonly based on computed tomography (CT) or magnetic resonance imaging (MRI) of the brain. On a CT scan, CSDH is usually of hypo- or isodense character and will feature a concavo-convex shape between the skull and the cortex.

For symptomatic CSDHs, the treatment is operative. The mainstay of treatment includes burr-hole craniostomy and intraoperative intracranial irrigation followed by subdural drainage [1]. With current treatment strategies, the recurrence rate after CSDH treatment is approximately 10% [2]. Low risk of bias evidence exists on the role of subdural drain in recurrence rate reduction but the role of intraoperative irrigation is more controversial. Our literature review revealed a total of ten studies assessing the effect of intraoperative irrigation: only one study employed a randomised study protocol [3] while the others were retrospective analyses. Sample sizes ranged from 56 to 186 patients, and the most commonly used outcome was the rate of haematoma recurrence. Of these ten studies, two studies found that intraoperative irrigation was associated with a significantly lower recurrence rate in comparison to no intraoperative irrigation [4,5], six studies found no difference in recurrence rates between intraoperative and no intraoperative irrigation [3,6–10], and two studies found that no intraoperative irrigation was associated with a significantly lower recurrence rate compared to irrigation [11,12].

It is possible that intraoperative irrigation is an unnecessary prolongation of the surgical procedure, thereby increasing the risk for infections, rebleeding and the stress levels of patients undergoing the procedure under local anaesthesia. There is also evidence to suggest that irrigation *per se* may be harmful: There are reports of increased risk of treatment-associated morbidity and complications such as postoperative pneumocephalus [9,11,13] and also of direct irrigation-induced intracerebral and subarachnoid haemorrhage [14].

1  
2  
3  
4  
5 We designed a pragmatic, parallel group, randomised, controlled multicentre non-inferiority trial to compare  
6 the use of intraoperative irrigation with no intraoperative irrigation for the operation of symptomatic CSDH  
7 (by burr-hole craniostomy and subdural drainage for 48 hours). We hypothesise that a treatment that involves  
8 no intraoperative irrigation results in non-inferior outcome compared to a treatment that involves  
9 intraoperative irrigation. Non-inferiority of the new treatment (no irrigation) with respect to the gold standard  
10 treatment (irrigation) is of interest on the premise that the new treatment has some other advantages, such  
11 as shorter operative time and therefore reduced stress to patient, reduced cost, fewer adverse events (harm)  
12 and technically more simple [15]. We consider non-inferiority proven if the rate of recurrence in the no-  
13 irrigation group is within the pre-defined non-inferiority margin of the rate observed in the irrigation group  
14 together with no significantly increased risk of harm.  
15  
16  
17  
18  
19  
20  
21  
22  
23  
24  
25  
26  
27  
28  
29  
30  
31  
32  
33  
34  
35  
36  
37  
38  
39  
40  
41  
42  
43  
44  
45  
46  
47  
48  
49  
50  
51  
52  
53  
54  
55  
56  
57  
58  
59  
60

# MATERIALS AND ANALYSIS

## Overview of study design

FINISH is a multicentre, prospective non-inferiority randomised controlled trial, with the primary objective to compare intraoperative irrigation to no irrigation in the treatment of CSDH by single burr-hole craniostomy and subdural drainage. Except for randomisation to irrigation versus no irrigation, the management of study participants will not differ. Eligible participants are block randomised in a 1:1 allocation rate to one of two arms: i) intraoperative irrigation, or ii) no intraoperative irrigation.

The study is registered at ClinicalTrials.gov (NCT04203550) and this protocol has been written according to the Standard Protocols Items: Recommendations for Interventional Trials (SPIRIT) guidelines for reporting a randomised controlled trial study protocol (the SPIRIT Figure and Checklist are available as Additional File 1) [16].

## Study settings

Participating sites are the neurosurgical departments at Helsinki University Hospital (Helsinki, Finland), Kuopio University Hospital (Kuopio, Finland), Tampere University Hospital (Tampere, Finland), Turku University Hospital (Turku, Finland) and Oulu University Hospital (Oulu, Finland). All these five units are tertiary referral centres and the only units delivering neurosurgical care in Finland.

## Participant selection and recruiting process

We will screen all patients who are referred for CSDH surgery to the aforementioned departments of neurosurgery for trial eligibility. A standard clinical examination and a brain CT or MRI examination will be performed. Patients with clinical and imaging findings consistent with a diagnosis of symptomatic CSDH and considered to benefit from operative treatment of CSDH by single burr-hole evacuation will be asked to participate in the trial.

## Inclusion criteria

- Patients with a symptomatic unilateral or bilateral CSDH requiring burr-hole evacuation
  - o Predominantly hypodense or isodense on imaging (CT/MRI)
  - o Clinical symptoms correlating with the CSDH
  - o Patients with bilaterally operated CSDHs will be treated with the same protocol on both sides and analysed as a single study participant
- Patients older than 18 years of age

## Exclusion criteria

- CSDH requiring surgical treatment other than burr-hole evacuation (e.g. craniotomy)
- CSDH in a patient who has a cerebrospinal fluid shunt
- Patients who have undergone any prior intracranial surgery
- Comatose patients (GCS 8 or lower) with absent motor responses to painful stimuli; decerebrate or decorticate posturing
- Patient's postoperative cooperation is suspected to be insufficient for drain usage (i.e. disoriented or semiconscious patient)
- Patient who has received active treatment for a haematogenic malignancy within the previous five years
- Patient with a central nervous system malignancy or tumour that may cause the patient's current symptoms or may interfere with the operation. For example, a small incidental meningioma without associated brain oedema, not in the vicinity of the planned burr-hole, is not an exclusion criterion.
- Patient has an acute infection that requires antibiotic treatment
- Patient has a high risk of life-threatening thrombosis (e.g. recent coronary stent, intracranial stent, recent pulmonary embolism, low pressure cardiac valve replacement [mitral- or tricuspid valve replacement]) and discontinuation of antithrombotic medication is not recommended

## Informed consent

At the first appointment in the emergency department or the neurosurgical ward, the attending neurosurgeon will provide the patients with detailed written and oral information on the trial and ask patients to sign an informed consent form. Withdrawal from the study is possible at any time, without affecting the course of conventional treatment, in accordance with the latest version of the declaration of Helsinki 2013 [17]. Due to the nature and emergency aspects of the disease (mass effect on the brain causing confusion and disorientation, lowered level of consciousness requiring urgent surgery), some patients will not be able to give written consent prior to randomisation. If the patient is unable to give written consent prior to the



1  
2  
3 randomisation, delayed consent will be sought. In these cases, oral consent will be obtained from a close  
4 relative after providing information regarding the trial and the patient is randomised. Following  
5 randomisation, written consent will primarily be obtained from the patient. In case of the patient being unable  
6 to give written consent due to neurological disability, written consent is obtained from a close relative. In  
7 these cases, the close relative has the right to withdraw the patient's consent at any time. Patients who are  
8 eligible for the trial but are not willing to undergo randomisation will be asked to be included in a  
9 simultaneous, pragmatic follow-up cohort.

10  
11  
12  
13  
14  
15 Participants will be asked to sign the local Biobank agreements in order to collect and store subdural fluid  
16 samples (see below) and two venous blood samples (2 x 10 ml).  
17  
18  
19  
20  
21

## 22 **Collected data**

23  
24  
25 We will document data in the electronic Case Report Form (eCRF) preoperatively, intraoperatively and within  
26 48–72h postoperatively, as well as at 6 weeks ( $\pm 2$  weeks) and at 6 months (see Table 1 for table of events). All  
27 patients' preoperative and postoperative head CTs or MRs images will be sent to the Picture Archiving and  
28 Communication System (PACS) of the methods centre (Helsinki University Hospital) for analysis. Ten percent  
29 of all images will be double read by independent assessors blinded to other patient information. To preserve  
30 confidentiality, all participants are allocated a unique study identifier during the recruitment process, which is  
31 used on all data collection forms. All study documentation is held in secure offices, and the study researchers  
32 operate according to a signed code of confidentiality. All data are entered into a password-secured database  
33 by the data managers.  
34  
35  
36  
37  
38  
39  
40  
41  
42

## 43 **Surgical technique**

44  
45  
46 Current management of CSDHs at all participating centres includes single burr-hole evacuation with  
47 intraoperative irrigation followed by passive subdural drainage. As a routine, all burr-hole craniostomies are  
48 performed under local anaesthesia, often combined with intravenous sedation with benzodiazepines and/or  
49 opioids during the operation. General anaesthesia is only used if the neurosurgeon or the anaesthesiologist  
50 considers it unsafe to perform the procedure under local anaesthesia. Routine preoperative antibiotic is given  
51 according to local protocols (normally a second-generation cephalosporin 30–60 min prior to incision).  
52 Typically, the surgeon drills one 14-mm burr hole over the maximum convexity of the CSDH. In case of bilateral  
53 CSDHs, the surgeon performs the same procedure on both sides. If irrigation is utilized, after opening the dura,  
54 the surgeon irrigates the subdural collection with warm (body temperature) Ringer's lactate saline until rinsing  
55  
56  
57  
58  
59  
60

1  
2  
3 appears clear or at least 200 ml (in case of bilateral CSHD, 200 ml per side, i.e. 400 ml total). After that, the  
4 surgeon will insert the subdural drain 3–5 cm deep and parallel to skull. The position of the drain (anterior,  
5 posterior) is left to the discretion of the physician. Burr hole covers or haemostatics are not routinely used  
6 (e.g. Spongostan®, Tachosil®). The type of subdural drain is not standardized, but all study centres use 10F  
7 drains. Following drain insertion, the distal end is tunnelled approximately 4–5 cm from the incision and  
8 connected to a passive ventricular drainage bag (through a non-return valve) and the skin incision is closed in  
9 two layers (normally is absorbable 3-0 suture for subcutis/galea and non-absorbable 4-0 suture for skin). The  
10 drain is fixed to the skin in a secure way. The drain-to-skin fixation technique is left to the discretion of the  
11 operating surgeon. The drainage bag is positioned at bed level. The duration of subdural drainage is 48 hours  
12 ( $\pm 12$  hours) [18,19]. Patient mobilization is allowed during drainage. Prophylactic antibiotics during drainage  
13 are not routinely used.  
14  
15  
16  
17  
18  
19  
20  
21  
22  
23

## 24 Randomisation

25  
26  
27 Patients will be randomised in a 1:1 allocation ratio stratified only by study centre. We will use a random block  
28 randomisation technique, with a random block size of 4, 6 or 8. A member of the FINISH study group will carry  
29 out randomisation when the patient is at the OR at the beginning of the operation. The randomisation will  
30 occur just prior to skin incision. The randomisation is a built-in property in the online eCRF form system used  
31 in the trial (provided by Granitics Inc., Espoo, Finland).  
32  
33  
34  
35  
36  
37

## 38 Intervention

### 39 *Irrigation group (IR)*

40  
41  
42 A burr-hole craniostomy is performed as described earlier. The dura is opened sharply and 10 ml of subdural  
43 exudate is aspirated with blunt aspiration needle for a CSDH sample to be stored at  $-75^{\circ}\text{C}$  to be used for later  
44 analysis. Subdural space is irrigated by repeated rinsing with body temperature saline solution with a syringe  
45 and blunt needle until surgeon considers exudate to be clear. Minimum volume of irrigation will be 200 ml per  
46 operated side. The subdural drain is inserted 3–5 cm underneath the skull and parallel to it. Thereafter,  
47 operation is completed as described earlier. The total volume of irrigation as well as the duration of operation  
48 is recorded.  
49  
50  
51  
52  
53  
54  
55  
56  
57  
58  
59  
60

### ***No-irrigation group (N-IR)***

A burr-hole craniostomy is performed as described earlier. A small incision in the dura is made and 10 ml of subdural exudate is aspirated with a blunt aspiration needle for a CSDH sample to be stored at -75°C to be used for later analysis. The subdural drain is inserted approximately 3–5 cm underneath the skull and parallel to it. Thereafter, the operation is completed as described earlier. The duration of the operation is recorded.

### **Blinding**

Due to the nature of the treatment, it is not possible to blind the surgeon and OR staff from the treatment allocation. Measures to minimize bias include:

- The randomisation is timed as closely as possible to the time of surgery (just prior to skin incision)
- The patient will not be informed of treatment allocation
- Treatment allocation will not be documented in medical records (i.e. all personnel participating in patient care after the operation will be blinded to allocation)
- The study group members collecting postoperative data, outcome data, imaging data and performing the statistical analyses will be blinded to treatment arm over the entire course of the trial, until the data analyses are carried out.
- The primary and secondary outcome measures (see below) are all evaluated in blinded matter, i.e. the outcome assessor will be blinded with regard to treatment allocation

Emergency unblinding will occur only in exceptional circumstances when requested by the patient's clinical team (e.g. need to treat a serious adverse event [SAE]), when knowledge of the actual treatment is essential for further management of the patient.

### **Compliance to treatment allocation and possible crossover**

- If the patient is randomised to the IR group and the intracranial irrigation volume is between 1 ml and 200 ml, the patient is not considered a crossover.
- If the patient is randomised to the IR group and the intracranial irrigation volume is 0 ml, the patient is considered a crossover (belongs to the N-IR group).
- If the patient is randomised to the N-IR group and 1 ml to 199 ml of intracranial irrigation is used, the patient is not considered a crossover.

- If the patient is randomised to the N-IR group and  $\geq 200$  ml of intracranial irrigation is used, the patient is considered a crossover (belongs to the IR group).
- In case of intervention failure (e.g. not being able to insert subdural drain, intended or unintended drain removal before 36h), the patient is not considered a crossover.

## Primary outcome measure

Our primary outcome measure is the rate of reoperations of ipsilateral CSDHs within 6 months.

## Indication for reoperation and reoperation technique

The decision to proceed to reoperation is made by the treating neurosurgeon and will be made by the same indications as the primary operation (i.e. symptom recurrence or insufficient resolution of clinical symptoms correlating to imaging findings [CT or MR imaging] of CSDH). All reoperations will be conducted according to the current standard (i.e. burr-hole with irrigation and subdural drain placement). In case of recurrence requiring reoperation, unblinding will not occur automatically, only in cases when the neurosurgery team treating the patient considers this information necessarily for optimal care of the patient.

## Secondary outcome measures

The study is not powered for secondary outcome measure comparisons and these outcomes (analyses) will be considered exploratory. The secondary outcomes include:

1. Modified Rankin Scale at 6 months after operation
2. Mortality within 6 months of operation
3. Duration of the operation
4. Hospital length of stay (index hospital and need for further care)
5. CSDH volume reduction at 2 months after operation

## Safety endpoints

Safety endpoints within 6-months of operation, including the number and severity of adverse events (AE) and procedure related adverse events (PRAE). Adverse events are categorized as serious adverse events

(SAE) and minor adverse events (MAE). Procedure related (severe and minor) adverse events will be reported separately.

SAE are defined as any inappropriate medical occurrence or effect that results in death, is life-threatening, requires hospitalization or prolongation of an existing inpatient hospitalization, results in persistent or significant disability or incapacity, or is another important medical event.

- Life-threatening in the definition of SAE refers to an event when the patient was at risk of death at the time of the event and does not refer to an event where the event might have hypothetically caused death. Prolonged hospitalization due to delayed transfer will not be considered an AE or SAE.

Examples of SAEs are death, acute myocardial infarction, pulmonary embolism, systemic infection, acute cerebral infarction (PRAE), intracranial infection (PRAE), epileptic seizures (PRAE) and acute postoperative intracranial haematoma (PRAE).

MAE are defined as clinically mild manifestations, referent to that the patient might be aware of the event or symptom but the event or symptom is easily tolerated by the patient.

- Examples of MAEs are local wound infection manageable with oral antibiotics (PRAE), abnormal skin bleeding from the wound (PRAE), other local infection manageable with oral antibiotics and deep venous thrombosis not causing pulmonary embolism.

## Follow-up

The follow-up period is 6 months. We will arrange a clinical outpatient follow-up visit for all patients at 4–8 weeks postoperatively (6 weeks  $\pm$  2 weeks). Before that, a postoperative brain CT will be performed. If the patient was preoperatively using any form of antithrombotic medication, the medication is not routinely restarted without reasonable clinical indication before the control brain CT. All recurrences requiring surgery within 6 months and complications within 6 months will be recorded. At 6 months, functional outcome (mRS) will be assessed by a FINISH study group member by phone interview. Further, for each patient, mortality will be verified through the Finnish Official Cause-of-Death Statistics at 6 months. This statutory register is virtually 100% complete because each death, its associated official death-certificate, and the corresponding person information in the Finnish computerized population register are cross-checked.

## Sample size

1  
2  
3 The trial is designed to ascertain whether drain without irrigation is non-inferior to drain with irrigation, with  
4 the rate of reoperations of ipsilateral CSDHs within 6 months as the primary outcome. We based the standard  
5 rate of reoperations (9.6%) on the results from a recent Cochrane review that reported the recurrence rates  
6 after CSDH evacuation followed by subdural drainage in six RCTs with more than 30 patients per treatment  
7 arm [2]. This yielded a maximum allowed margin of 9.0% to achieve non-inferiority. Following a consensus  
8 meeting with the trial investigators, the non-inferiority margin was lowered to 7.5%. Thus, with a non-  
9 inferiority margin of 7.5%, a 2.5% level of statistical significance ( $\alpha = 0.025$ ) and an 80% power ( $\beta =$   
10 0.20), we will need 243 patients per study group [20]. Accounting for a drop-out rate of 10%, required group  
11 size increases to 270 per study group. Accordingly, we set the recruitment target at 540 patients.  
12  
13  
14  
15  
16  
17  
18  
19

## 20 **Data management**

21  
22  
23 All study data will be stored in an eCRF provided by Granitics Inc (Espoo, Finland). Data are entered locally by  
24 the local research team. Upon receipt of the data, the FINISH personnel, blinded to the group allocation, will  
25 make a visual check of the data and query all missing, implausible and inconsistent data. Hospital patient  
26 records will also be utilized to collect missing data and to interpret inconsistent or implausible data. Participant  
27 files will be maintained in storage (both in electronic and paper format) at the coordinating centre for a period  
28 of 15 years after completion of the study.  
29  
30  
31  
32  
33  
34  
35

## 36 **Data sharing**

37  
38  
39 Data generated by our study will be made available as soon as possible and will be available upon reasonable  
40 request. Data access requests will be reviewed by the FINISH steering group. Requestors will be required to  
41 sign a Data Access Agreement. Only anonymized data will be shared.  
42  
43  
44  
45

## 46 **Statistical analysis**

47  
48  
49 The statistical analysis will be performed both according to intention-to-treat (ITT) and per protocol (PP)  
50 principles. We will claim non-inferiority of single burr-hole evacuation without irrigation and subdural drainage  
51 only if this outcome is supported both by the ITT and the PP analysis. The ITT analysis will be performed using  
52 the full analysis set (FAS), defined as all randomised patients in the groups allocated to by the randomisation.  
53 No exclusions other than caused by missing information will be made. No imputation will take place. The PP  
54  
55  
56  
57  
58  
59  
60

1  
2  
3 analysis will be performed on the subset of FAS that is compliant with the protocol have a completed  
4 treatment, available measurements, and neither major protocol violations nor entry criteria violations.  
5  
6

7  
8 Summary statistics will be presented for both groups. Continuous variables will be presented in terms of mean  
9 values or medians with standard deviations and interquartile ranges, respectively. Categorical variables will  
10 be presented with relative frequencies in percent.  
11  
12

13  
14 The results from the statistical analysis will be considered to support a claim of non-inferiority if the upper  
15 limit of a one-sided 97.5% confidence interval (or equivalently a 95% two-sided confidence interval) excludes  
16 a difference in the primary endpoint in favour of the irrigation group of more than 7.5%. The centre  
17 stratification of the randomisation will be accounted for in the calculation of the confidence interval.  
18  
19

20  
21 Exploratory analyses of secondary and other binary endpoints will be performed using the Chi-squared test or  
22 logistic regression analysis. Continuous outcomes will be analysed using Student's t-test or ANCOVA. Potential  
23 effect modifiers (patient age, unilateral versus bilateral CSDH, use of antithrombotic medication, preoperative  
24 mRS and preoperative clinical status, haematoma density, haematoma size and presence of membranes on  
25 preoperative imaging) will be analysed by including interaction terms in statistical models.  
26  
27  
28  
29

30  
31 The primary endpoint will be investigated as described above using a confidence interval, which is equivalent  
32 to using a non-inferiority test with a one-sided p-value of 0.025 (or a two-sided of 0.05). The statistical testing  
33 of other endpoints will also be performed using a two-sided significance level of 0.05. The statistical analysis  
34 will be performed using appropriate statistical software packages.  
35  
36  
37

38  
39 Prior to the statistical analysis, a statistical analysis plan will be finalised and an independent statistician will  
40 approve a dataset with sufficient data quality for the statistical analysis. Another statistician blinded to  
41 treatment arm will perform the analyses.  
42  
43  
44

#### 45 46 ***Blinded data interpretation***

47  
48 As in previous studies [21,22], we will interpret the results of the trial according to a blinded data  
49 interpretation scheme [23]. In brief, an independent statistician will provide the Writing Committee of the  
50 FINISH trial with blinded results from the analyses with the groups labelled group A and group B. The Writing  
51 Committee will then contemplate the interpretation of the results until a consensus is reached and all  
52 alternative interpretations of the findings are agreed upon in writing. Once a consensus is reached, we will  
53 record the minutes of this meeting in a document coined "statement of interpretation", which will be signed  
54 by all members of the Writing Committee. Only after reaching this common agreement will the data manager  
55 and independent statistician break the randomisation code and the correct interpretation chosen. A  
56  
57  
58  
59  
60

1  
2  
3 manuscript will then be prepared and finalized for the publication of the results. Detailed minutes of blinded  
4 data interpretation meetings will be provided as a supplement to the trial manuscript.  
5  
6  
7

## 8 **Patient and public involvement**

9  
10  
11  
12 To achieve a more patient-friendly design for our trial, we recruited five patient experts from the European  
13 Patients' Academy on Therapeutic Innovation (EUPATI Finland, <https://fi.eupati.eu/>). They were asked to  
14 review the informed consent form and questionnaires of the study. These experts were asked to assess the  
15 burden of the intervention and time required to participate in the study, both of which they estimated to be  
16 reasonable. After the FINISH study is completed, we will deliberate together with EUPATI Finland on how to  
17 share the study results with the general public.  
18  
19  
20  
21  
22

## 23 **Data Safety and Monitoring Committee**

24  
25  
26  
27  
28 Study monitoring is provided by the Clinical Research Institute of Helsinki University Hospital, who will ensure  
29 the quality of data collection and trial integrity. The monitoring is performed in accordance with currently valid  
30 rules and regulations, Good Clinical Practice (ICH-GCP) and the standardized instructions of the Clinical  
31 Research Institute Helsinki University Hospital.  
32  
33  
34

35  
36  
37 The members of the Data Safety and Monitoring Committee (DSMC) are neurosurgeons independent of the  
38 trial and have neither financial nor scientific conflicts of interest with the trial. The DSMC will oversee the  
39 interim analyses. The purpose of the interim analysis is safety surveillance. The interim analyses are performed  
40 after 50, 100 and 200 patients. No efficacy-related early stopping is planned.  
41  
42  
43  
44

## 45 **Ethics and dissemination**

46  
47  
48  
49 The study was approved by the institutional review board (IRB) of the Helsinki and Uusimaa Hospital District  
50 on November 13, 2019 (HUS/3035/2019 §238, updated 26.2.2020) and duly registered at ClinicalTrials.gov  
51 (NCT04203550).  
52  
53  
54

55  
56 All participating centres will obtain local institutional research approvals for the consent form template, the  
57 eCRF and any additional protocol amendments. Any protocol amendment will be communicated to the site  
58 investigators, the IRB, trial participants and trial registries as necessary.  
59  
60



1  
2  
3  
4  
5 Information about the study participants will be kept confidential and will be managed in accordance with the  
6 following rules: 1) all study-related information is stored securely at the clinical sites, 2) all possible study  
7 participant information in paper form is stored in locked file cabinets and is accessible only to study personnel,  
8 3) all CRFs are identified only by a coded patient number, 4) all records that contain patient names or other  
9 identifying information are stored separately from the study records that are identified only by the coded  
10 patient number and 5) all local databases are password protected.  
11  
12  
13  
14  
15

16 The results of the study will be published in an international journal and presented at (inter)national  
17 congresses. Trial results will be disseminated to the public in collaboration with EUPATI Finland.  
18  
19  
20  
21  
22  
23  
24  
25  
26  
27  
28  
29  
30  
31  
32  
33  
34  
35  
36  
37  
38  
39  
40  
41  
42  
43  
44  
45  
46  
47  
48  
49  
50  
51  
52  
53  
54  
55  
56  
57  
58  
59  
60

## DISCUSSION

To the best of our knowledge, this is the first large scale multicentre RCT comparing intraoperative irrigation with no intraoperative irrigation after burr-hole craniostomy and subdural drain placement for CSDH. The incidence of CSDH in Finland is approximately 18/100,000, reaching as high as 130/100,000 in persons over 80 years old [24]. As a consequence of the ageing population, more frequent use of antithrombotic medication and the improved access to diagnostics in most high-income countries, the incidence of CSDH is expected to increase in the future [25]. The risk of complications following CSDH is rather low, but reducing the risk of recurrence is essential to avoid over-hospitalization of otherwise fragile patients, which could be detrimental [26]. Current studies examining strategies to decrease risk of recurrence include the Swedish study of irrigation-fluid temperature in the evacuation of chronic subdural haematoma (SIC!) [27], the Dutch dexamethasone therapy versus surgery for chronic subdural haematoma (DECSA trial) [28], the British dexamethasone for adult patients with a symptomatic chronic subdural haematoma (Dex-CSDH) trial [29], and two Canadian studies looking at the role of tranexamic acid in the treatment of chronic subdural haematomas (TRACS trial, NCT02568124 [30] and TRACE trial, NCT03280212).

A multicentre RCT that could show a decrease in recurrence rates has the potential to set a new gold standard of therapy, which would influence the treatment of these patients all over the world. If subdural irrigation fails to show any benefit over no irrigation, it would translate to a reduction in the risk of iatrogenic surgical complications and shortened operation times. It may also enable opportunities to develop newer, minimally invasive surgical techniques, including only subdural drain placement. This would not only benefit the individual patient but also health care systems all over the world, considering the sharply increasing incidence of CSDH.

A major strength of the study is that the five participating centres cover 100% of the Finnish population in terms of provision of neurosurgical care. In Finland, the surgical treatment of CSDH is exclusively carried out in University Hospital clinics, meaning that the follow-up regarding the primary endpoint (recurrence) should be 100%. Also, in a highly digitalized healthcare system (local electronic healthcare databases since the early 2000s and nationwide electronic healthcare database since 2010) where every citizen has a unique personal identification number, the chances for successful follow-up regarding other endpoints is extremely high. A limitation is that it is impossible to blind the treating surgeon in relation to the treatment arm (irrigation or no irrigation). Furthermore, we cannot adjust for subtle differences in surgical technique between surgeons, although all participating centres as a whole perform the surgeries similarly. For example, the normal surgical

1  
2  
3 technique involves irrigation until the fluid is deemed to be clear. However, in order to ensure a sufficient  
4 amount irrigation, we set a minimum threshold of 200 ml (per side).  
5  
6  
7

## 8 TRIAL STATUS 9

10  
11  
12 The trial started recruiting patients in January 2020 in Helsinki and the other centres will start recruiting during  
13 the spring of 2020.  
14  
15  
16  
17  
18  
19  
20  
21  
22  
23  
24  
25  
26  
27  
28  
29  
30  
31  
32  
33  
34  
35  
36  
37  
38  
39  
40  
41  
42  
43  
44  
45  
46  
47  
48  
49  
50  
51  
52  
53  
54  
55  
56  
57  
58  
59  
60

For peer review only

## REFERENCES

1. Koliaas AG, Chari A, Santarius T, Hutchinson PJ. Chronic subdural haematoma: modern management and emerging therapies. *Nat Rev Neurol* [Internet]. Nature Publishing Group; 2014 [cited 2019 Jun 10];10:570–8. Available from: <http://www.nature.com/articles/nrneurol.2014.163>
2. Peng D, Zhu Y. External drains versus no drains after burr-hole evacuation for the treatment of chronic subdural haematoma in adults. *Cochrane Database Syst Rev* [Internet]. John Wiley & Sons, Ltd; 2016 [cited 2019 Sep 19]; Available from: <http://doi.wiley.com/10.1002/14651858.CD011402.pub2>
3. Gurelik M, Aslan A, Gurelik B, Ozum U, Karadag Ö, Kars HZ, et al. A Safe and Effective Method for Treatment of Chronic Subdural Haematoma. *Can J Neurol Sci* [Internet]. 2007 [cited 2019 Jun 10];34:84–7. Available from: <http://www.ncbi.nlm.nih.gov/pubmed/17352353>
4. Lee C, Park DS, Song SW, Chun Y Il, Cho J, Moon CT, et al. Effect of Intra-operative Saline Irrigation during Burr Hole Surgery on the Recurrence for Chronic Subdural Hematomas. *The Nerve* [Internet]. Korean Society of Peripheral Nervous System; 2015 [cited 2019 Jun 10];1:26–9. Available from: <http://thenerve.net/journal/view.php?doi=10.21129/nerve.2015.1.1.26>
5. Jang K-M, Kwon J-T, Hwang S-N, Park Y-S, Nam T-K. Comparison of the Outcomes and Recurrence with Three Surgical Techniques for Chronic Subdural Hematoma: Single, Double Burr Hole, and Double Burr Hole Drainage with Irrigation. *Korean J neurotrauma* [Internet]. Korean Neurotraumatology Society; 2015 [cited 2019 Apr 9];11:75–80. Available from: <http://www.ncbi.nlm.nih.gov/pubmed/27169069>
6. Iftikhar M, Siddiqui UT, Rauf MY, Malik AO, Javed G. Comparison of Irrigation versus No Irrigation during Burr Hole Evacuation of Chronic Subdural Hematoma. *J Neurol Surg A Cent Eur Neurosurg* [Internet]. 2016 [cited 2019 Jun 10];77:416–21. Available from: <http://www.thieme-connect.de/DOI/DOI?10.1055/s-0035-1564049>
7. Ishibashi A, Yokokura Y, Adachi H. A Comparative Study of Treatments for Chronic Subdural Hematoma: Burr Hole Drainage versus Burr Hole Drainage with Irrigation. *Kurume Med J* [Internet]. 2011 [cited 2019 Apr 9];58:35–9. Available from: <https://www.ncbi.nlm.nih.gov/pubmed/?term=Ishibashi+A%2C+Yokokura+Y%2C+Adachi+H.+A+comparative+study+of+treatments+for+chronic+subdural+hematoma%3A+burr+hole+drainage+versus+burr+hole+drainage+with+irrigation.+Kurume+Med+J.+2011%3B58%3A35-9>
8. Suzuki K, Sugita K, Akai T, Takahata T, Sonobe M, Takahashi S. Treatment of chronic subdural hematoma by closed-system drainage without irrigation. *Surg Neurol* [Internet]. Elsevier; 1998 [cited 2019 Jun 10];50:231–4. Available from: <https://www.sciencedirect.com/science/article/pii/S009030199700339X?via%3Dihub>
9. Wang Q-P, Yuan Y, Guan J-W, Jiang X-B. A comparative study of irrigation versus no irrigation during burr hole craniostomy to treat chronic subdural hematoma. *BMC Surg* [Internet]. BioMed Central; 2017 [cited 2019 Jun 19];17:99. Available from: <http://www.ncbi.nlm.nih.gov/pubmed/28893217>
10. Zakaraia AM, Adnan JS, Haspani MSM, Naing NN, Abdullah JM. Outcome of 2 different types of operative techniques practiced for chronic subdural hematoma in Malaysia: an analysis. *Surg Neurol* [Internet]. Elsevier; 2008 [cited 2019 Jun 10];69:608–15. Available from: <https://www.sciencedirect.com/science/article/pii/S0090301907001978?via%3Dihub>
11. Kim DH, Kim HS, Choi HJ, Han IH, Cho WH, Nam KH. Recurrence of the Chronic Subdural Hematoma after Burr-Hole Drainage with or without Intraoperative Saline Irrigation. *Korean J neurotrauma* [Internet]. Korean Neurotraumatology Society; 2014 [cited 2019 Jun 10];10:101–5. Available from: <http://www.ncbi.nlm.nih.gov/pubmed/27169042>
12. Kuroki T, Katsume M, Harada N, Yamazaki T, Aoki K, Takasu N. Strict closed-system drainage for treating chronic subdural haematoma. *Acta Neurochir (Wien)* [Internet]. 2001 [cited 2019 Apr 9];143:1041–4. Available from: <https://link.springer.com/content/pdf/10.1007/s007010170010.pdf>
13. Ihab Z. Pneumocephalus after surgical evacuation of chronic subdural hematoma: Is it a serious complication? *Asian J Neurosurg* [Internet]. Wolters Kluwer -- Medknow Publications; 2012 [cited 2019 Jun 20];7:66–74. Available from: <http://www.ncbi.nlm.nih.gov/pubmed/22870154>

14. Seung W-B, Jeong JH. Postoperative Subarachnoid Hemorrhage and Multipunctate Intracerebral Hemorrhages Following Evacuation of Bilateral Chronic Subdural Hematomas. *Korean J neurotrauma* [Internet]. Korean Neurotraumatology Society; 2017 [cited 2019 Jun 20];13:149–52. Available from: <http://www.ncbi.nlm.nih.gov/pubmed/29201851>
15. Piaggio G, Elbourne DR, Pocock SJ, Evans SJW, Altman DG, CONSORT Group for the. Reporting of Noninferiority and Equivalence Randomized Trials. *JAMA* [Internet]. American Medical Association; 2012 [cited 2019 Sep 20];308:2594. Available from: <http://jama.jamanetwork.com/article.aspx?doi=10.1001/jama.2012.87802>
16. Chan AW, Tetzlaff JM, Gøtzsche PC, Altman DG, Mann H, Berlin JA, et al. SPIRIT 2013 explanation and elaboration: guidance for protocols of clinical trials. *BMJ*. 2013;346.
17. World Medical Association declaration of Helsinki: Ethical principles for medical research involving human subjects. *JAMA - J. Am. Med. Assoc.* 2013.
18. Santarius T, Kirkpatrick PJ, Ganesan D, Chia HL, Jalloh I, Smielewski P, et al. Use of drains versus no drains after burr-hole evacuation of chronic subdural haematoma: a randomised controlled trial. *Lancet*. 2009;
19. Glancz LJ, Poon MTC, Coulter IC, Hutchinson PJ, Koliass AG, Brennan PM, et al. Does Drain Position and Duration Influence Outcomes in Patients Undergoing Burr-Hole Evacuation of Chronic Subdural Hematoma? Lessons from a UK Multicenter Prospective Cohort Study. *Neurosurgery* [Internet]. Narnia; 2018 [cited 2019 Sep 19];85:486–93. Available from: <https://academic.oup.com/neurosurgery/advance-article/doi/10.1093/neuros/nyy366/5086667>
20. Blackwelder WC. “Proving the Null Hypothesis” in Clinical Trials. *Control Clin Trials*. Elsevier; 1982;3:345–53.
21. Sihvonen R, Paavola M, Malmivaara A, Itala A, Joukainen A, Nurmi H, et al. Arthroscopic partial meniscectomy versus sham surgery for a degenerative meniscal tear. *N Engl J Med*. United States; 2013;369:2515–24.
22. Paavola M, Malmivaara A, Taimela S, Kanto K, Inkinen J, Kalske J, et al. Subacromial decompression versus diagnostic arthroscopy for shoulder impingement: randomised, placebo surgery controlled clinical trial. *BMJ*. England; 2018;362:k2860.
23. Jarvinen TLN, Sihvonen R, Bhandari M, Sprague S, Malmivaara A, Paavola M, et al. Blinded interpretation of study results can feasibly and effectively diminish interpretation bias. *J Clin Epidemiol*. United States; 2014;67:769–72.
24. Rauhala M, Luoto TM, Huhtala H, Iverson GL, Niskakangas T, Öhman J, et al. The incidence of chronic subdural hematomas from 1990 to 2015 in a defined Finnish population. *J Neurosurg*. 2019;
25. Ducruet AF, Grobelny BT, Zacharia BE, Hickman ZL, Derosa PL, Anderson K, et al. The surgical management of chronic subdural hematoma. 2010 [cited 2019 Jun 28]; Available from: <https://link.springer.com/content/pdf/10.1007%2Fs10143-011-0349-y.pdf>
26. Bartek J, Sjøvik K, Kristiansson H, Ståhl F, Fornebo I, Förander P, et al. Predictors of Recurrence and Complications After Chronic Subdural Hematoma Surgery: A Population-Based Study. *World Neurosurg* [Internet]. Elsevier; 2017 [cited 2019 Apr 9];106:609–14. Available from: <https://www.sciencedirect.com/science/article/pii/S1878875017311440?via%3Dihub>
27. Bartley A, Jakola AS, Bartek J, Sundblom J, Förander P, Marklund N, et al. The Swedish study of Irrigation-fluid temperature in the evacuation of Chronic subdural hematoma (SIC!): study protocol for a multicenter randomized controlled trial. *Trials* [Internet]. BioMed Central; 2017 [cited 2019 Jun 28];18:471. Available from: <http://www.ncbi.nlm.nih.gov/pubmed/29021000>
28. Miah IP, Holl DC, Peul WC, Walchenbach R, Kruyt N, de Laat K, et al. Dexamethasone therapy versus surgery for chronic subdural haematoma (DECSA trial): study protocol for a randomised controlled trial. *Trials* [Internet]. BioMed Central; 2018 [cited 2019 Jun 28];19:575. Available from: <http://www.ncbi.nlm.nih.gov/pubmed/30342554>
29. Koliass AG, Edlmann E, Thelin EP, Bulters D, Holton P, Suttner N, et al. Dexamethasone for adult patients with a symptomatic chronic subdural haematoma (Dex-CSDH) trial: study protocol for a randomised controlled trial. *Trials* [Internet]. 2018 [cited 2020 Jan 18];19:670. Available from: <https://trialsjournal.biomedcentral.com/articles/10.1186/s13063-018-3050-4>
30. Iorio-Morin C, Blanchard J, Richer M, Mathieu D. Tranexamic Acid in Chronic Subdural Hematomas (TRACS): study protocol for a randomized controlled trial. *Trials* [Internet]. BioMed Central; 2016 [cited 2019 Jun 30];17:235. Available

1  
2  
3 from: <http://trialsjournal.biomedcentral.com/articles/10.1186/s13063-016-1358-5>  
4  
5

6  
7 2. Peng D, Zhu Y. External drains versus no drains after burr-hole evacuation for the treatment of chronic subdural  
8 haematoma in adults. *Cochrane Database Syst Rev* [Internet]. John Wiley & Sons, Ltd; 2016 [cited 2019 Sep 19];  
9 Available from: <http://doi.wiley.com/10.1002/14651858.CD011402.pub2>

10  
11 3. Gurelik M, Aslan A, Gurelik B, Ozum U, Karadag Ö, Kars HZ, et al. A Safe and Effective Method for Treatment of  
12 Chronic Subdural Haematoma. *Can J Neurol Sci* [Internet]. 2007 [cited 2019 Jun 10];34:84–7. Available from:  
13 <http://www.ncbi.nlm.nih.gov/pubmed/17352353>

14  
15 4. Lee C, Park DS, Song SW, Chun Y II, Cho J, Moon CT, et al. Effect of Intra-operative Saline Irrigation during Burr Hole  
16 Surgery on the Recurrence for Chronic Subdural Hematomas. *The Nerve* [Internet]. Korean Society of Peripheral  
17 Nervous System; 2015 [cited 2019 Jun 10];1:26–9. Available from:  
18 <http://thenerve.net/journal/view.php?doi=10.21129/nerve.2015.1.1.26>

19  
20 5. Jang K-M, Kwon J-T, Hwang S-N, Park Y-S, Nam T-K. Comparison of the Outcomes and Recurrence with Three Surgical  
21 Techniques for Chronic Subdural Hematoma: Single, Double Burr Hole, and Double Burr Hole Drainage with Irrigation.  
22 *Korean J neurotrauma* [Internet]. Korean Neurotraumatology Society; 2015 [cited 2019 Apr 9];11:75–80. Available  
23 from: <http://www.ncbi.nlm.nih.gov/pubmed/27169069>

24  
25 6. Iftikhar M, Siddiqui UT, Rauf MY, Malik AO, Javed G. Comparison of Irrigation versus No Irrigation during Burr Hole  
26 Evacuation of Chronic Subdural Hematoma. *J Neurol Surg A Cent Eur Neurosurg* [Internet]. 2016 [cited 2019 Jun  
27 10];77:416–21. Available from: <http://www.thieme-connect.de/DOI/DOI?10.1055/s-0035-1564049>

28  
29 7. Ishibashi A, Yokokura Y, Adachi H. A Comparative Study of Treatments for Chronic Subdural Hematoma: Burr Hole  
30 Drainage versus Burr Hole Drainage with Irrigation. *Kurume Med J* [Internet]. 2011 [cited 2019 Apr 9];58:35–9. Available  
31 from:  
32 <https://www.ncbi.nlm.nih.gov/pubmed/?term=Ishibashi+A%2C+Yokokura+Y%2C+Adachi+H.+A+comparative+study+of+treatments+for+chronic+subdural+hematoma%3A+burr+hole+drainage+versus+burr+hole+drainage+with+irrigation.+K+urume+Med+J.+2011%3B58%3A35-9>

33  
34 8. Suzuki K, Sugita K, Akai T, Takahata T, Sonobe M, Takahashi S. Treatment of chronic subdural hematoma by closed-  
35 system drainage without irrigation. *Surg Neurol* [Internet]. Elsevier; 1998 [cited 2019 Jun 10];50:231–4. Available from:  
36 <https://www.sciencedirect.com/science/article/pii/S009030199700339X?via%3Dihub>

37  
38 9. Wang Q-P, Yuan Y, Guan J-W, Jiang X-B. A comparative study of irrigation versus no irrigation during burr hole  
39 craniostomy to treat chronic subdural hematoma. *BMC Surg* [Internet]. BioMed Central; 2017 [cited 2019 Jun 19];17:99.  
40 Available from: <http://www.ncbi.nlm.nih.gov/pubmed/28893217>

41  
42 10. Zakaraia AM, Adnan JS, Haspani MSM, Naing NN, Abdullah JM. Outcome of 2 different types of operative  
43 techniques practiced for chronic subdural hematoma in Malaysia: an analysis. *Surg Neurol* [Internet]. Elsevier; 2008  
44 [cited 2019 Jun 10];69:608–15. Available from:  
45 <https://www.sciencedirect.com/science/article/pii/S0090301907001978?via%3Dihub>

46  
47 11. Kim DH, Kim HS, Choi HJ, Han IH, Cho WH, Nam KH. Recurrence of the Chronic Subdural Hematoma after Burr-Hole  
48 Drainage with or without Intraoperative Saline Irrigation. *Korean J neurotrauma* [Internet]. Korean Neurotraumatology  
49 Society; 2014 [cited 2019 Jun 10];10:101–5. Available from: <http://www.ncbi.nlm.nih.gov/pubmed/27169042>

50  
51 12. Kuroki T, Katsume M, Harada N, Yamazaki T, Aoki K, Takasu N. Strict closed-system drainage for treating chronic  
52 subdural haematoma. *Acta Neurochir (Wien)* [Internet]. 2001 [cited 2019 Apr 9];143:1041–4. Available from:  
53 <https://link.springer.com/content/pdf/10.1007/s007010170010.pdf>

54  
55 13. Ihab Z. Pneumocephalus after surgical evacuation of chronic subdural hematoma: Is it a serious complication? *Asian  
56 J Neurosurg* [Internet]. Wolters Kluwer -- Medknow Publications; 2012 [cited 2019 Jun 20];7:66–74. Available from:  
57 <http://www.ncbi.nlm.nih.gov/pubmed/22870154>

58  
59 14. Seung W-B, Jeong JH. Postoperative Subarachnoid Hemorrhage and Multipunctate Intracerebral Hemorrhages  
60 Following Evacuation of Bilateral Chronic Subdural Hematomas. *Korean J neurotrauma* [Internet]. Korean  
Neurotraumatology Society; 2017 [cited 2019 Jun 20];13:149–52. Available from:  
<http://www.ncbi.nlm.nih.gov/pubmed/29201851>

15. Piaggio G, Elbourne DR, Pocock SJ, Evans SJW, Altman DG, CONSORT Group for the. Reporting of Noninferiority and Equivalence Randomized Trials. *JAMA* [Internet]. American Medical Association; 2012 [cited 2019 Sep 20];308:2594. Available from: <http://jama.jamanetwork.com/article.aspx?doi=10.1001/jama.2012.87802>
16. Chan AW, Tetzlaff JM, Gøtzsche PC, Altman DG, Mann H, Berlin JA, et al. SPIRIT 2013 explanation and elaboration: guidance for protocols of clinical trials. *BMJ*. 2013;346.
17. World Medical Association declaration of Helsinki: Ethical principles for medical research involving human subjects. *JAMA - J. Am. Med. Assoc.* 2013.
18. Santarius T, Kirkpatrick PJ, Ganesan D, Chia HL, Jalloh I, Smielewski P, et al. Use of drains versus no drains after burr-hole evacuation of chronic subdural haematoma: a randomised controlled trial. *Lancet*. 2009;
19. Glancz LJ, Poon MTC, Coulter IC, Hutchinson PJ, Koliass AG, Brennan PM, et al. Does Drain Position and Duration Influence Outcomes in Patients Undergoing Burr-Hole Evacuation of Chronic Subdural Hematoma? Lessons from a UK Multicenter Prospective Cohort Study. *Neurosurgery* [Internet]. Narnia; 2018 [cited 2019 Sep 19];85:486–93. Available from: <https://academic.oup.com/neurosurgery/advance-article/doi/10.1093/neuros/nyy366/5086667>
20. Audigier V, White IR, Jolani S, Debray TPA, Quartagno M, Carpenter J, et al. Multiple Imputation for Multilevel Data with Continuous and Binary Variables. *Stat Sci*. 2018;33:160–83.
21. Sihvonen R, Paavola M, Malmivaara A, Itala A, Joukainen A, Nurmi H, et al. Arthroscopic partial meniscectomy versus sham surgery for a degenerative meniscal tear. *N Engl J Med. United States*; 2013;369:2515–24.
22. Paavola M, Malmivaara A, Taimela S, Kanto K, Inkinen J, Kalske J, et al. Subacromial decompression versus diagnostic arthroscopy for shoulder impingement: randomised, placebo surgery controlled clinical trial. *BMJ. England*; 2018;362:k2860.
23. Jarvinen TLN, Sihvonen R, Bhandari M, Sprague S, Malmivaara A, Paavola M, et al. Blinded interpretation of study results can feasibly and effectively diminish interpretation bias. *J Clin Epidemiol. United States*; 2014;67:769–72.
24. Rauhala M, Luoto TM, Huhtala H, Iverson GL, Niskakangas T, Öhman J, et al. The incidence of chronic subdural hematomas from 1990 to 2015 in a defined Finnish population. *J Neurosurg*. 2019;
25. Ducruet AF, Grobelny BT, Zacharia BE, Hickman ZL, Derosa PL, Anderson K, et al. The surgical management of chronic subdural hematoma. 2010 [cited 2019 Jun 28]; Available from: <https://link.springer.com/content/pdf/10.1007%2Fs10143-011-0349-y.pdf>
26. Bartek J, Sjøvik K, Kristiansson H, Ståhl F, Fornebo I, Förander P, et al. Predictors of Recurrence and Complications After Chronic Subdural Hematoma Surgery: A Population-Based Study. *World Neurosurg* [Internet]. Elsevier; 2017 [cited 2019 Apr 9];106:609–14. Available from: <https://www.sciencedirect.com/science/article/pii/S1878875017311440?via%3Dihub>
27. Bartley A, Jakola AS, Bartek J, Sundblom J, Förander P, Marklund N, et al. The Swedish study of Irrigation-fluid temperature in the evacuation of Chronic subdural hematoma (SIC!): study protocol for a multicenter randomized controlled trial. *Trials* [Internet]. BioMed Central; 2017 [cited 2019 Jun 28];18:471. Available from: <http://www.ncbi.nlm.nih.gov/pubmed/29021000>
28. Miah IP, Holl DC, Peul WC, Walchenbach R, Kruyt N, de Laat K, et al. Dexamethasone therapy versus surgery for chronic subdural haematoma (DECSA trial): study protocol for a randomised controlled trial. *Trials* [Internet]. BioMed Central; 2018 [cited 2019 Jun 28];19:575. Available from: <http://www.ncbi.nlm.nih.gov/pubmed/30342554>
29. Koliass AG, Edlmann E, Thelin EP, Bulters D, Holton P, Suttner N, et al. Dexamethasone for adult patients with a symptomatic chronic subdural haematoma (Dex-CSDH) trial: study protocol for a randomised controlled trial. *Trials* [Internet]. 2018 [cited 2020 Jan 18];19:670. Available from: <https://trialsjournal.biomedcentral.com/articles/10.1186/s13063-018-3050-4>
30. Iorio-Morin C, Blanchard J, Richer M, Mathieu D. Tranexamic Acid in Chronic Subdural Hematomas (TRACS): study protocol for a randomized controlled trial. *Trials* [Internet]. BioMed Central; 2016 [cited 2019 Jun 30];17:235. Available from: <http://trialsjournal.biomedcentral.com/articles/10.1186/s13063-016-1358-5>

## Footnotes

**Trial sponsor:** Helsinki University Hospital

**Author statement:** Kimmo Lönnrot, Rahul Raj, Christoph Schwartz, Riku Kivisaari, Jarno Satopää, Teemu Luostarinen, Teppo Järvinen and Simo Taimela designed the trial. Pihla Tommiska, Rahul Raj, Christoph Schwartz, Teemu Luostarinen, Jarno Satopää, Simo Taimela, Teppo Järvinen, Jussi Posti, Teemu Luoto, Ville Leinonen, Sami Tetri, Timo Koivisto and Kimmo Lönnrot have been involved in drafting the manuscript or revising it critically for important intellectual content. All authors read and approved the final manuscript.

**Funding:** This study was supported by the State funding for university-level health research (Helsinki University Hospitals), Finska Läkaresällskapet, Medicinska Understödsföreningen Liv & Hälsa. The funding source will have no role in the collection, analysis and interpretation of data; in the writing of the report and in the decision to submit the article for publication.

**Conflicts of interests:** None.

**Patient consent for publication:** Not required.

**Provenance and peer review:** Not commissioned; externally peer reviewed.

**Data availability statement:** Anonymized data are available on reasonable request.

**Acknowledgments:** Pihla Tommiska has received personal research grants from The Finnish Medical Foundation, Orion Research Foundation sr and Maire Taponen Foundation. Jussi Posti is funded by the Academy of Finland (grant #17379) and the Maire Taponen Foundation.



## Study administration structure

**Writing Committee:** Pihla Tommiska, Rahul Raj, Christoph Schwartz, Teemu Luostarinen, Jarno Satopää, Simo Taimela, Teppo Järvinen, Jussi Posti, Teemu Luoto, Ville Leinonen, Sami Tetri, Timo Koivisto and Kimmo Lönnrot

**Steering Committee:** Kimmo Lönnrot (chair), Riku Kivisaari (co-chair), Teemu Luostarinen (co-chair), Rahul Raj, Jussi Posti, Teemu Luoto, Ville Leinonen, Sami Tetri and Timo Koivisto

**Methods Centre:** Helsinki University Hospital: Rahul Raj (principal investigator), Jarno Satopää (co-principal investigator), Pihla Tommiska (co-principal investigator, data management), Maarit Tuomisto (research coordinator)

**Central Adjudication Committee:** Kimmo Lönnrot, Riku Kivisaari, Teemu Luostarinen, Rahul Raj, Jussi Posti, Teemu Luoto, Ville Leinonen, Sami Tetri and Timo Koivisto

**Data Safety Monitoring Board:** Martin Lehecka (MD, PhD, A. Prof, Helsinki University Hospital, Finland), Frederick A. Zeiler (MD, PhD, A. Prof, Rady Faculty of Health Sciences, University of Manitoba, Canada), Jiri Bartek Jr. (MD, Karolinska University Hospital, Stockholm, Sweden)

**Table 1:** Table of events

| Assessment                            | Baseline | Surgery | 48–72h | 6 weeks | 6 months |
|---------------------------------------|----------|---------|--------|---------|----------|
| Informed consent                      | X        |         |        |         |          |
| Randomisation                         |          | X       |        |         |          |
| Demographics                          | X        |         |        |         |          |
| Antithrombotic medication             | X        |         | X      | X       | X        |
| Neurological symptoms                 | X        |         | X      | X       | X        |
| Residence and mobility                | X        |         |        | X       | X        |
| Imaging                               | X        |         |        | X       |          |
| Surgical details                      |          | X       |        |         |          |
| Modified Rankin Scale                 | X        |         | X      | X       | X        |
| Survival status                       |          |         |        |         | X        |
| Need for ipsilateral CSDH reoperation |          |         |        |         | X        |
| Adverse events                        |          |         | X      | X       | X        |

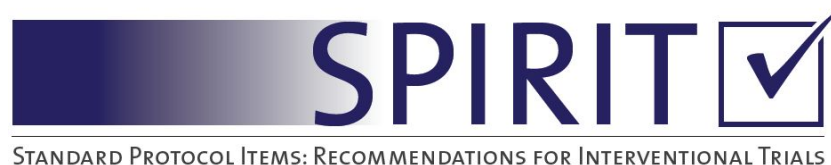

SPIRIT 2013 Checklist: Recommended items to address in a clinical trial protocol and related documents\*

| Section/item                      | Item No | Description                                                                                                                                                                                                                                                                              | Addressed on page number |
|-----------------------------------|---------|------------------------------------------------------------------------------------------------------------------------------------------------------------------------------------------------------------------------------------------------------------------------------------------|--------------------------|
| <b>Administrative information</b> |         |                                                                                                                                                                                                                                                                                          |                          |
| Title                             | 1       | Descriptive title identifying the study design, population, interventions, and, if applicable, trial acronym                                                                                                                                                                             | 1                        |
| Trial registration                | 2a      | Trial identifier and registry name. If not yet registered, name of intended registry                                                                                                                                                                                                     | 1                        |
|                                   | 2b      | All items from the World Health Organization Trial Registration Data Set                                                                                                                                                                                                                 | 4-6                      |
| Protocol version                  | 3       | Date and version identifier                                                                                                                                                                                                                                                              | footnote                 |
| Funding                           | 4       | Sources and types of financial, material, and other support                                                                                                                                                                                                                              | 27                       |
| Roles and responsibilities        | 5a      | Names, affiliations, and roles of protocol contributors                                                                                                                                                                                                                                  | 1, 27                    |
|                                   | 5b      | Name and contact information for the trial sponsor                                                                                                                                                                                                                                       | 1                        |
|                                   | 5c      | Role of study sponsor and funders, if any, in study design; collection, management, analysis, and interpretation of data; writing of the report; and the decision to submit the report for publication, including whether they will have ultimate authority over any of these activities | 27                       |
|                                   | 5d      | Composition, roles, and responsibilities of the coordinating centre, steering committee, endpoint adjudication committee, data management team, and other individuals or groups overseeing the trial, if applicable (see Item 21a for data monitoring committee)                         | 28                       |

1 **Introduction**

2

3 Background and 6a Description of research question and justification for undertaking the trial, including summary of relevant 9  
 4 rationale studies (published and unpublished) examining benefits and harms for each intervention  
 5

6 6b Explanation for choice of comparators 9  
 7

8 Objectives 7 Specific objectives or hypotheses 10  
 9

10 Trial design 8 Description of trial design including type of trial (eg, parallel group, crossover, factorial, single group),  
 11 allocation ratio, and framework (eg, superiority, equivalence, noninferiority, exploratory) 10  
 12  
 13

14 **Methods: Participants, interventions, and outcomes**

15

16 Study setting 9 Description of study settings (eg, community clinic, academic hospital) and list of countries where data will 11  
 17 be collected. Reference to where list of study sites can be obtained  
 18

19 Eligibility criteria 10 Inclusion and exclusion criteria for participants. If applicable, eligibility criteria for study centres and 11, 12  
 20 individuals who will perform the interventions (eg, surgeons, psychotherapists)  
 21

22 Interventions 11a Interventions for each group with sufficient detail to allow replication, including how and when they will be 13, 14  
 23 administered  
 24

25 11b Criteria for discontinuing or modifying allocated interventions for a given trial participant (eg, drug dose 15  
 26 change in response to harms, participant request, or improving/worsening disease)  
 27

28 11c Strategies to improve adherence to intervention protocols, and any procedures for monitoring adherence 15  
 29 (eg, drug tablet return, laboratory tests)  
 30

31 11d Relevant concomitant care and interventions that are permitted or prohibited during the trial 13, 14  
 32

33 Outcomes 12 Primary, secondary, and other outcomes, including the specific measurement variable (eg, systolic blood  
 34 pressure), analysis metric (eg, change from baseline, final value, time to event), method of aggregation (eg, 15, 16  
 35 median, proportion), and time point for each outcome. Explanation of the clinical relevance of chosen  
 36 efficacy and harm outcomes is strongly recommended  
 37

38 Participant timeline 13 Time schedule of enrolment, interventions (including any run-ins and washouts), assessments, and visits for Table 1  
 39 participants. A schematic diagram is highly recommended (see Figure)  
 40  
 41  
 42  
 43  
 44  
 45  
 46

|   |             |    |                                                                                                                                                                                       |    |
|---|-------------|----|---------------------------------------------------------------------------------------------------------------------------------------------------------------------------------------|----|
| 1 | Sample size | 14 | Estimated number of participants needed to achieve study objectives and how it was determined, including clinical and statistical assumptions supporting any sample size calculations | 17 |
| 2 |             |    |                                                                                                                                                                                       |    |
| 3 |             |    |                                                                                                                                                                                       |    |
| 4 | Recruitment | 15 | Strategies for achieving adequate participant enrolment to reach target sample size                                                                                                   | 17 |
| 5 |             |    |                                                                                                                                                                                       |    |

6 **Methods: Assignment of interventions (for controlled trials)**

7 Allocation:

|    |                     |     |                                                                                                                                                                                                                                                                                                                                                          |    |
|----|---------------------|-----|----------------------------------------------------------------------------------------------------------------------------------------------------------------------------------------------------------------------------------------------------------------------------------------------------------------------------------------------------------|----|
| 10 | Sequence generation | 16a | Method of generating the allocation sequence (eg, computer-generated random numbers), and list of any factors for stratification. To reduce predictability of a random sequence, details of any planned restriction (eg, blocking) should be provided in a separate document that is unavailable to those who enrol participants or assign interventions | 14 |
| 11 |                     |     |                                                                                                                                                                                                                                                                                                                                                          |    |
| 12 |                     |     |                                                                                                                                                                                                                                                                                                                                                          |    |
| 13 |                     |     |                                                                                                                                                                                                                                                                                                                                                          |    |
| 14 |                     |     |                                                                                                                                                                                                                                                                                                                                                          |    |
| 15 |                     |     |                                                                                                                                                                                                                                                                                                                                                          |    |

|    |                                  |     |                                                                                                                                                                                                           |    |
|----|----------------------------------|-----|-----------------------------------------------------------------------------------------------------------------------------------------------------------------------------------------------------------|----|
| 16 | Allocation concealment mechanism | 16b | Mechanism of implementing the allocation sequence (eg, central telephone; sequentially numbered, opaque, sealed envelopes), describing any steps to conceal the sequence until interventions are assigned | 14 |
| 17 |                                  |     |                                                                                                                                                                                                           |    |
| 18 |                                  |     |                                                                                                                                                                                                           |    |
| 19 |                                  |     |                                                                                                                                                                                                           |    |

|    |                |     |                                                                                                                           |    |
|----|----------------|-----|---------------------------------------------------------------------------------------------------------------------------|----|
| 20 | Implementation | 16c | Who will generate the allocation sequence, who will enrol participants, and who will assign participants to interventions | 14 |
| 21 |                |     |                                                                                                                           |    |
| 22 |                |     |                                                                                                                           |    |
| 23 |                |     |                                                                                                                           |    |

|    |                    |     |                                                                                                                                           |    |
|----|--------------------|-----|-------------------------------------------------------------------------------------------------------------------------------------------|----|
| 24 | Blinding (masking) | 17a | Who will be blinded after assignment to interventions (eg, trial participants, care providers, outcome assessors, data analysts), and how | 15 |
| 25 |                    |     |                                                                                                                                           |    |
| 26 |                    |     |                                                                                                                                           |    |

|    |  |     |                                                                                                                                                      |    |
|----|--|-----|------------------------------------------------------------------------------------------------------------------------------------------------------|----|
| 27 |  | 17b | If blinded, circumstances under which unblinding is permissible, and procedure for revealing a participant's allocated intervention during the trial | 15 |
| 28 |  |     |                                                                                                                                                      |    |
| 29 |  |     |                                                                                                                                                      |    |
| 30 |  |     |                                                                                                                                                      |    |

31 **Methods: Data collection, management, and analysis**

|    |                         |     |                                                                                                                                                                                                                                                                                                                                                                                                              |        |
|----|-------------------------|-----|--------------------------------------------------------------------------------------------------------------------------------------------------------------------------------------------------------------------------------------------------------------------------------------------------------------------------------------------------------------------------------------------------------------|--------|
| 33 | Data collection methods | 18a | Plans for assessment and collection of outcome, baseline, and other trial data, including any related processes to promote data quality (eg, duplicate measurements, training of assessors) and a description of study instruments (eg, questionnaires, laboratory tests) along with their reliability and validity, if known. Reference to where data collection forms can be found, if not in the protocol | 17, 18 |
| 34 |                         |     |                                                                                                                                                                                                                                                                                                                                                                                                              |        |
| 35 |                         |     |                                                                                                                                                                                                                                                                                                                                                                                                              |        |
| 36 |                         |     |                                                                                                                                                                                                                                                                                                                                                                                                              |        |
| 37 |                         |     |                                                                                                                                                                                                                                                                                                                                                                                                              |        |

|    |  |     |                                                                                                                                                                                           |        |
|----|--|-----|-------------------------------------------------------------------------------------------------------------------------------------------------------------------------------------------|--------|
| 38 |  | 18b | Plans to promote participant retention and complete follow-up, including list of any outcome data to be collected for participants who discontinue or deviate from intervention protocols | 17, 18 |
| 39 |  |     |                                                                                                                                                                                           |        |
| 40 |  |     |                                                                                                                                                                                           |        |
| 41 |  |     |                                                                                                                                                                                           |        |
| 42 |  |     |                                                                                                                                                                                           |        |

|    |                                 |     |                                                                                                                                                                                                                                                                                                                                       |        |
|----|---------------------------------|-----|---------------------------------------------------------------------------------------------------------------------------------------------------------------------------------------------------------------------------------------------------------------------------------------------------------------------------------------|--------|
| 1  | Data management                 | 19  | Plans for data entry, coding, security, and storage, including any related processes to promote data quality (eg, double data entry; range checks for data values). Reference to where details of data management procedures can be found, if not in the protocol                                                                     | 18     |
| 2  |                                 |     |                                                                                                                                                                                                                                                                                                                                       |        |
| 3  |                                 |     |                                                                                                                                                                                                                                                                                                                                       |        |
| 4  |                                 |     |                                                                                                                                                                                                                                                                                                                                       |        |
| 5  | Statistical methods             | 20a | Statistical methods for analysing primary and secondary outcomes. Reference to where other details of the statistical analysis plan can be found, if not in the protocol                                                                                                                                                              | 18     |
| 6  |                                 |     |                                                                                                                                                                                                                                                                                                                                       |        |
| 7  |                                 |     |                                                                                                                                                                                                                                                                                                                                       |        |
| 8  |                                 | 20b | Methods for any additional analyses (eg, subgroup and adjusted analyses)                                                                                                                                                                                                                                                              | 18     |
| 9  |                                 |     |                                                                                                                                                                                                                                                                                                                                       |        |
| 10 |                                 | 20c | Definition of analysis population relating to protocol non-adherence (eg, as randomised analysis), and any statistical methods to handle missing data (eg, multiple imputation)                                                                                                                                                       | 18     |
| 11 |                                 |     |                                                                                                                                                                                                                                                                                                                                       |        |
| 12 |                                 |     |                                                                                                                                                                                                                                                                                                                                       |        |
| 13 |                                 |     |                                                                                                                                                                                                                                                                                                                                       |        |
| 14 | <b>Methods: Monitoring</b>      |     |                                                                                                                                                                                                                                                                                                                                       |        |
| 15 |                                 |     |                                                                                                                                                                                                                                                                                                                                       |        |
| 16 | Data monitoring                 | 21a | Composition of data monitoring committee (DMC); summary of its role and reporting structure; statement of whether it is independent from the sponsor and competing interests; and reference to where further details about its charter can be found, if not in the protocol. Alternatively, an explanation of why a DMC is not needed | 20     |
| 17 |                                 |     |                                                                                                                                                                                                                                                                                                                                       |        |
| 18 |                                 |     |                                                                                                                                                                                                                                                                                                                                       |        |
| 19 |                                 |     |                                                                                                                                                                                                                                                                                                                                       |        |
| 20 |                                 |     |                                                                                                                                                                                                                                                                                                                                       |        |
| 21 |                                 |     |                                                                                                                                                                                                                                                                                                                                       |        |
| 22 |                                 | 21b | Description of any interim analyses and stopping guidelines, including who will have access to these interim results and make the final decision to terminate the trial                                                                                                                                                               | 20     |
| 23 |                                 |     |                                                                                                                                                                                                                                                                                                                                       |        |
| 24 |                                 |     |                                                                                                                                                                                                                                                                                                                                       |        |
| 25 | Harms                           | 22  | Plans for collecting, assessing, reporting, and managing solicited and spontaneously reported adverse events and other unintended effects of trial interventions or trial conduct                                                                                                                                                     | 16, 17 |
| 26 |                                 |     |                                                                                                                                                                                                                                                                                                                                       |        |
| 27 |                                 |     |                                                                                                                                                                                                                                                                                                                                       |        |
| 28 | Auditing                        | 23  | Frequency and procedures for auditing trial conduct, if any, and whether the process will be independent from investigators and the sponsor                                                                                                                                                                                           | 20     |
| 29 |                                 |     |                                                                                                                                                                                                                                                                                                                                       |        |
| 30 |                                 |     |                                                                                                                                                                                                                                                                                                                                       |        |
| 31 |                                 |     |                                                                                                                                                                                                                                                                                                                                       |        |
| 32 | <b>Ethics and dissemination</b> |     |                                                                                                                                                                                                                                                                                                                                       |        |
| 33 |                                 |     |                                                                                                                                                                                                                                                                                                                                       |        |
| 34 | Research ethics approval        | 24  | Plans for seeking research ethics committee/institutional review board (REC/IRB) approval                                                                                                                                                                                                                                             | 20     |
| 35 |                                 |     |                                                                                                                                                                                                                                                                                                                                       |        |
| 36 |                                 |     |                                                                                                                                                                                                                                                                                                                                       |        |
| 37 | Protocol amendments             | 25  | Plans for communicating important protocol modifications (eg, changes to eligibility criteria, outcomes, analyses) to relevant parties (eg, investigators, REC/IRBs, trial participants, trial registries, journals, regulators)                                                                                                      | 20     |
| 38 |                                 |     |                                                                                                                                                                                                                                                                                                                                       |        |
| 39 |                                 |     |                                                                                                                                                                                                                                                                                                                                       |        |
| 40 |                                 |     |                                                                                                                                                                                                                                                                                                                                       |        |
| 41 |                                 |     |                                                                                                                                                                                                                                                                                                                                       |        |
| 42 |                                 |     |                                                                                                                                                                                                                                                                                                                                       |        |

|    |                               |     |                                                                                                                                                                                                                                                                                     |        |
|----|-------------------------------|-----|-------------------------------------------------------------------------------------------------------------------------------------------------------------------------------------------------------------------------------------------------------------------------------------|--------|
| 1  | Consent or assent             | 26a | Who will obtain informed consent or assent from potential trial participants or authorised surrogates, and how (see Item 32)                                                                                                                                                        | 12     |
| 2  |                               |     |                                                                                                                                                                                                                                                                                     |        |
| 3  |                               |     |                                                                                                                                                                                                                                                                                     |        |
| 4  |                               | 26b | Additional consent provisions for collection and use of participant data and biological specimens in ancillary studies, if applicable                                                                                                                                               | 12     |
| 5  |                               |     |                                                                                                                                                                                                                                                                                     |        |
| 6  |                               |     |                                                                                                                                                                                                                                                                                     |        |
| 7  | Confidentiality               | 27  | How personal information about potential and enrolled participants will be collected, shared, and maintained in order to protect confidentiality before, during, and after the trial                                                                                                | 13, 18 |
| 8  |                               |     |                                                                                                                                                                                                                                                                                     |        |
| 9  |                               |     |                                                                                                                                                                                                                                                                                     |        |
| 10 | Declaration of interests      | 28  | Financial and other competing interests for principal investigators for the overall trial and each study site                                                                                                                                                                       | 27     |
| 11 |                               |     |                                                                                                                                                                                                                                                                                     |        |
| 12 |                               |     |                                                                                                                                                                                                                                                                                     |        |
| 13 | Access to data                | 29  | Statement of who will have access to the final trial dataset, and disclosure of contractual agreements that limit such access for investigators                                                                                                                                     | 27     |
| 14 |                               |     |                                                                                                                                                                                                                                                                                     |        |
| 15 |                               |     |                                                                                                                                                                                                                                                                                     |        |
| 16 | Ancillary and post-trial care | 30  | Provisions, if any, for ancillary and post-trial care, and for compensation to those who suffer harm from trial participation                                                                                                                                                       | NA     |
| 17 |                               |     |                                                                                                                                                                                                                                                                                     |        |
| 18 |                               |     |                                                                                                                                                                                                                                                                                     |        |
| 19 |                               |     |                                                                                                                                                                                                                                                                                     |        |
| 20 | Dissemination policy          | 31a | Plans for investigators and sponsor to communicate trial results to participants, healthcare professionals, the public, and other relevant groups (eg, via publication, reporting in results databases, or other data sharing arrangements), including any publication restrictions | 19     |
| 21 |                               |     |                                                                                                                                                                                                                                                                                     |        |
| 22 |                               |     |                                                                                                                                                                                                                                                                                     |        |
| 23 |                               |     |                                                                                                                                                                                                                                                                                     |        |
| 24 |                               | 31b | Authorship eligibility guidelines and any intended use of professional writers                                                                                                                                                                                                      | NA     |
| 25 |                               |     |                                                                                                                                                                                                                                                                                     |        |
| 26 |                               | 31c | Plans, if any, for granting public access to the full protocol, participant-level dataset, and statistical code                                                                                                                                                                     | NA     |
| 27 |                               |     |                                                                                                                                                                                                                                                                                     |        |
| 28 |                               |     |                                                                                                                                                                                                                                                                                     |        |
| 29 | <b>Appendices</b>             |     |                                                                                                                                                                                                                                                                                     |        |
| 30 |                               |     |                                                                                                                                                                                                                                                                                     |        |
| 31 | Informed consent materials    | 32  | Model consent form and other related documentation given to participants and authorised surrogates                                                                                                                                                                                  | NA     |
| 32 |                               |     |                                                                                                                                                                                                                                                                                     |        |
| 33 |                               |     |                                                                                                                                                                                                                                                                                     |        |
| 34 | Biological specimens          | 33  | Plans for collection, laboratory evaluation, and storage of biological specimens for genetic or molecular analysis in the current trial and for future use in ancillary studies, if applicable                                                                                      | 13     |
| 35 |                               |     |                                                                                                                                                                                                                                                                                     |        |
| 36 |                               |     |                                                                                                                                                                                                                                                                                     |        |

37 \*It is strongly recommended that this checklist be read in conjunction with the SPIRIT 2013 Explanation & Elaboration for important clarification on the items.  
 38 Amendments to the protocol should be tracked and dated. The SPIRIT checklist is copyrighted by the SPIRIT Group under the Creative Commons  
 39 “[Attribution-NonCommercial-NoDerivs 3.0 Unported](https://creativecommons.org/licenses/by-nc-nd/3.0/)” license.  
 40  
 41  
 42

# BMJ Open

## The Finnish study of intraoperative irrigation versus drain alone after evacuation of chronic subdural haematoma (FINISH): a study protocol for a multicentre randomized controlled trial

|                                 |                                                                                                                                                                                                                                                                                                                                                                                                                                                                                                                                                                                                                                                                                                                                                                                                                                                                                                                                                                                                                                                                                                                                                                                                                                                                                                                                                                                                                                                                                                                                                                                                                                                                                                                                                                                                                                                                                                                                                                                                                               |
|---------------------------------|-------------------------------------------------------------------------------------------------------------------------------------------------------------------------------------------------------------------------------------------------------------------------------------------------------------------------------------------------------------------------------------------------------------------------------------------------------------------------------------------------------------------------------------------------------------------------------------------------------------------------------------------------------------------------------------------------------------------------------------------------------------------------------------------------------------------------------------------------------------------------------------------------------------------------------------------------------------------------------------------------------------------------------------------------------------------------------------------------------------------------------------------------------------------------------------------------------------------------------------------------------------------------------------------------------------------------------------------------------------------------------------------------------------------------------------------------------------------------------------------------------------------------------------------------------------------------------------------------------------------------------------------------------------------------------------------------------------------------------------------------------------------------------------------------------------------------------------------------------------------------------------------------------------------------------------------------------------------------------------------------------------------------------|
| Journal:                        | <i>BMJ Open</i>                                                                                                                                                                                                                                                                                                                                                                                                                                                                                                                                                                                                                                                                                                                                                                                                                                                                                                                                                                                                                                                                                                                                                                                                                                                                                                                                                                                                                                                                                                                                                                                                                                                                                                                                                                                                                                                                                                                                                                                                               |
| Manuscript ID                   | bmjopen-2020-038275.R1                                                                                                                                                                                                                                                                                                                                                                                                                                                                                                                                                                                                                                                                                                                                                                                                                                                                                                                                                                                                                                                                                                                                                                                                                                                                                                                                                                                                                                                                                                                                                                                                                                                                                                                                                                                                                                                                                                                                                                                                        |
| Article Type:                   | Protocol                                                                                                                                                                                                                                                                                                                                                                                                                                                                                                                                                                                                                                                                                                                                                                                                                                                                                                                                                                                                                                                                                                                                                                                                                                                                                                                                                                                                                                                                                                                                                                                                                                                                                                                                                                                                                                                                                                                                                                                                                      |
| Date Submitted by the Author:   | 13-May-2020                                                                                                                                                                                                                                                                                                                                                                                                                                                                                                                                                                                                                                                                                                                                                                                                                                                                                                                                                                                                                                                                                                                                                                                                                                                                                                                                                                                                                                                                                                                                                                                                                                                                                                                                                                                                                                                                                                                                                                                                                   |
| Complete List of Authors:       | <p>Tommiska, Pihla; Helsinki University Central Hospital, Department of Neurosurgery; University of Helsinki<br/> Rahul, Raj; Helsinki University Central Hospital, Department of Neurosurgery; University of Helsinki<br/> Schwartz, Christoph; University Hospital Salzburg, Paracelsus Medical University, Department of Neurosurgery; Helsinki University Central Hospital, Neurosurgery<br/> Kivisaari, Riku; Helsinki University Central Hospital, Department of Neurosurgery; University of Helsinki<br/> Luostarinen, T; Helsinki University Central Hospital, Department of Anesthesiology and Intensive Care; University of Helsinki<br/> Satopää, Jarno; Helsinki University Central Hospital, Department of Neurosurgery; University of Helsinki<br/> Taimela, Simo; Helsinki University Central Hospital, Orthopedics and Traumatology; University of Helsinki, Finnish Centre for Evidence-Based Orthopedics (FICEBO)<br/> Jarvinen, Teppo; Helsinki University Central Hospital, Department of Orthopaedics and Traumatology; University of Helsinki, Finland and Finnish Centre for Evidence-Based Orthopedics (FICEBO)<br/> Ranstam, Jonas; Lunds Universitet, Clinical sciences<br/> Frantzen, Janek; Turun Yliopistollinen Keskussairaala, Department of Neurosurgery; Helsinki University Central Hospital<br/> Posti, Jussi; Turku University Hospital, Department of Neurosurgery and Brain Injury Centre<br/> Luoto, Teemu M.; Tampere University Hospital, Department of Neurosurgery; Tampere University<br/> Leinonen, Ville; Kuopio University Hospital, Department of Neurosurgery; University of Eastern Finland School of Medicine<br/> Tetri, Sami; Oulu University Hospital, Department of Neurosurgery; Oulu University Faculty of Medicine<br/> Koivisto, Timo ; Kuopio University Hospital, Department of Neurosurgery; University of Eastern Finland School of Medicine<br/> Lönnrot, Kimmo; Helsinki University Central Hospital, Department of Neurosurgery; University of Helsinki</p> |
| <b>Primary Subject Heading</b>: | Surgery                                                                                                                                                                                                                                                                                                                                                                                                                                                                                                                                                                                                                                                                                                                                                                                                                                                                                                                                                                                                                                                                                                                                                                                                                                                                                                                                                                                                                                                                                                                                                                                                                                                                                                                                                                                                                                                                                                                                                                                                                       |



1  
2  
3  
4  
5  
6  
7  
8  
9  
10  
11  
12  
13  
14  
15  
16  
17  
18  
19  
20  
21  
22  
23  
24  
25  
26  
27  
28  
29  
30  
31  
32  
33  
34  
35  
36  
37  
38  
39  
40  
41  
42  
43  
44  
45  
46  
47  
48  
49  
50  
51  
52  
53  
54  
55  
56  
57  
58  
59  
60

|                            |                                                        |
|----------------------------|--------------------------------------------------------|
| Secondary Subject Heading: | Neurology                                              |
| Keywords:                  | NEUROSURGERY, Neurological injury < NEUROLOGY, SURGERY |
|                            |                                                        |

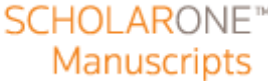



I, the Submitting Author has the right to grant and does grant on behalf of all authors of the Work (as defined in the below author licence), an exclusive licence and/or a non-exclusive licence for contributions from authors who are: i) UK Crown employees; ii) where BMJ has agreed a CC-BY licence shall apply, and/or iii) in accordance with the terms applicable for US Federal Government officers or employees acting as part of their official duties; on a worldwide, perpetual, irrevocable, royalty-free basis to BMJ Publishing Group Ltd ("BMJ") its licensees and where the relevant Journal is co-owned by BMJ to the co-owners of the Journal, to publish the Work in this journal and any other BMJ products and to exploit all rights, as set out in our [licence](#).

The Submitting Author accepts and understands that any supply made under these terms is made by BMJ to the Submitting Author unless you are acting as an employee on behalf of your employer or a postgraduate student of an affiliated institution which is paying any applicable article publishing charge ("APC") for Open Access articles. Where the Submitting Author wishes to make the Work available on an Open Access basis (and intends to pay the relevant APC), the terms of reuse of such Open Access shall be governed by a Creative Commons licence – details of these licences and which [Creative Commons](#) licence will apply to this Work are set out in our licence referred to above.

Other than as permitted in any relevant BMJ Author's Self Archiving Policies, I confirm this Work has not been accepted for publication elsewhere, is not being considered for publication elsewhere and does not duplicate material already published. I confirm all authors consent to publication of this Work and authorise the granting of this licence.

# STUDY PROTOCOL

**TITLE:** The Finnish study of intraoperative irrigation versus drain alone after evacuation of chronic subdural haematoma (FINISH): a study protocol for a multicentre randomized controlled trial

**AUTHORS:** Pihla Tommiska\*<sup>1</sup>, Rahul Raj\*<sup>1</sup>, Christoph Schwartz<sup>1,2</sup>, Riku Kivisaari<sup>1</sup>, Teemu Luostarinen<sup>3</sup>, Jarno Satopää<sup>1</sup>, Simo Taimela<sup>4,5</sup>, Teppo Järvinen<sup>4,5</sup>, Jonas Ranstam<sup>6</sup>, Janek Frantzén<sup>1,7</sup>, Jussi Posti<sup>7</sup>, Teemu Luoto<sup>8</sup>, Ville Leinonen<sup>9,10</sup>, Sami Tetri<sup>10</sup>, Timo Koivisto<sup>9</sup>, Kimmo Lönnrot<sup>1,4</sup>

- 1) Department of Neurosurgery, University of Helsinki and Helsinki University Hospital, Helsinki, Finland
- 2) Department of Neurosurgery, University Hospital Salzburg, Paracelsus Medical University, Salzburg, Austria
- 3) Division of Anaesthesiology, Department of Anaesthesiology, Intensive Care and Pain Medicine, Helsinki University Hospital, Helsinki, Finland
- 4) Finnish Centre for Evidence-Based Orthopedics (FICEBO), University of Helsinki and Helsinki University Hospital, Helsinki, Finland
- 5) Department of Orthopaedics and Traumatology, University of Helsinki and Helsinki University Hospital, Helsinki, Finland
- 6) Department of Clinical Sciences, Lund University, Lund, Sweden
- 7) Division of Clinical Neurosciences, Department of Neurosurgery and Turku Brain Centre, Turku University Hospital and University of Turku, Turku, Finland
- 8) Department of Neurosurgery, Tampere University Hospital and Tampere University, Tampere, Finland
- 9) Department of Neurosurgery, Kuopio University Hospital and University of Eastern Finland, Kuopio, Finland
- 10) Unit of Clinical Neuroscience, Neurosurgery, University of Oulu and Medical Research Center, Oulu, Finland

\*equal contribution

**Correspondence:**

Rahul Raj, MD, PhD

Department of Neurosurgery

University of Helsinki and Helsinki University Hospital

Topeliuksenkatu 5, P.B. 266, 00029 HUS, Helsinki, Finland

Phone: +358504272516

Email: rahul.raj@helsinki.fi

**ClinicalTrial registration number:** NCT04203550

**Keywords:** chronic subdural haematoma, surgical evacuation, recurrence, irrigation fluid

**Word count** (excluding title page, abstract, references, figures and tables): 4461

**Full author list:**

**Pihla Tommiska**, BM, Department of Neurosurgery, University of Helsinki and Helsinki University Hospital, Helsinki, Finland, [pihla.tommiska@helsinki.fi](mailto:pihla.tommiska@helsinki.fi)

**Rahul Raj**, MD, PhD, Department of Neurosurgery, University of Helsinki and Helsinki University Hospital, Helsinki, Finland, [rahul.raj@helsinki.fi](mailto:rahul.raj@helsinki.fi)

**Christoph Schwartz**, MD, PhD, Department of Neurosurgery, University of Helsinki and Helsinki University Hospital, Helsinki, Finland and Department of Neurosurgery, University Hospital Salzburg, Paracelsus Medical University, Salzburg, Austria, [c.schwartz@salk.at](mailto:c.schwartz@salk.at)

**Riku Kivisaari**, MD, PhD, Department of Neurosurgery, University of Helsinki and Helsinki University Hospital, Helsinki, Finland, [riku.kivisaari@hus.fi](mailto:riku.kivisaari@hus.fi)

**Teemu Luostarinen**, MD, PhD, Division of Anaesthesiology, Department of Anaesthesiology, Intensive Care and Pain Medicine, Helsinki University Hospital, Helsinki, Finland.  
[teemu.luostarinen@hus.fi](mailto:teemu.luostarinen@hus.fi)

**Jarno Satopää**, MD, PhD, Department of Neurosurgery, University of Helsinki and Helsinki University Hospital, Helsinki, Finland, [jarno.satopaa@hus.fi](mailto:jarno.satopaa@hus.fi)

**Simo Taimela**, MD, PhD, Department of Orthopaedics and Traumatology, University of Helsinki and Helsinki University Hospital, Helsinki, Finland and Finnish Centre for Evidence-Based Orthopedics (FICEBO), University of Helsinki and Helsinki University Hospital, Helsinki, Finland,  
[simo.taimela@helsinki.fi](mailto:simo.taimela@helsinki.fi)

**Teppo Järvinen**, MD, PhD, Department of Orthopaedics and Traumatology, University of Helsinki and Helsinki University Hospital, Helsinki, Finland and Finnish Centre for Evidence-Based Orthopedics (FICEBO), University of Helsinki and Helsinki University Hospital, Helsinki, Finland,  
[teppo.jarvinen@helsinki.fi](mailto:teppo.jarvinen@helsinki.fi)

**Jonas Ranstam**, PhD, Department of Clinical Sciences, Lund University, Lund, Sweden,  
[jonas.ranstam@mdas.se](mailto:jonas.ranstam@mdas.se)

**Janek Frantzén**, MD, PhD, Department of Neurosurgery, University of Helsinki and Helsinki University Hospital, Helsinki, Finland and Division of Clinical Neurosciences, Department of Neurosurgery and Turku Brain Centre, Turku University Hospital and University of Turku, Turku, Finland, [janek.frantzen@tyks.fi](mailto:janek.frantzen@tyks.fi)

**Jussi Posti**, MD, PhD, Division of Clinical Neurosciences, Department of Neurosurgery and Turku Brain Centre, Turku University Hospital and University of Turku, Turku, Finland, [jussi.posti@utu.fi](mailto:jussi.posti@utu.fi)

**Teemu Luoto**, MD, PhD, Department of Neurosurgery, Tampere University Hospital and Tampere University, Tampere, Finland, [teemu.luoto@pshp.fi](mailto:teemu.luoto@pshp.fi)

1  
2  
3 **Ville Leinonen**, MD, PhD, Department of Neurosurgery, Kuopio University Hospital and University  
4 of Eastern Finland, Kuopio, Finland and Unit of Clinical Neuroscience, Neurosurgery, University of  
5 Oulu and Medical Research Center, Oulu, Finland, [ville.leinonen@kuh.fi](mailto:ville.leinonen@kuh.fi)  
6  
7

8 **Sami Tetri**, MD, PhD, Unit of Clinical Neuroscience, Neurosurgery, University of Oulu and Medical  
9 Research Center, Oulu, Finland, [sami.tetri@ppshp.fi](mailto:sami.tetri@ppshp.fi)  
10

11 **Timo Koivisto**, MD, PhD, Department of Neurosurgery, Kuopio University Hospital and University of  
12 Eastern Finland, Kuopio, Finland, [timo.koivisto@kuh.fi](mailto:timo.koivisto@kuh.fi)  
13  
14

15 **Kimmo Lönnrot**, MD, PhD, Department of Neurosurgery, University of Helsinki and Helsinki  
16 University Hospital, Helsinki, Finland and Finnish Centre for Evidence-Based Orthopedics (FICEBO),  
17 University of Helsinki and Helsinki University Hospital, Helsinki, Finland, [kimmo.lonnrot@hus.fi](mailto:kimmo.lonnrot@hus.fi)  
18  
19  
20  
21  
22  
23  
24  
25  
26  
27  
28  
29  
30  
31  
32  
33  
34  
35  
36  
37  
38  
39  
40  
41  
42  
43  
44  
45  
46  
47  
48  
49  
50  
51  
52  
53  
54  
55  
56  
57  
58  
59  
60

## ABSTRACT

**Introduction:** Chronic subdural haematomas (CSDHs) are one of the most common neurosurgical conditions. The goal of surgery is to alleviate symptoms and minimize the risk of symptomatic recurrences. In the past, re-operation rates as high as 20–30% were described for CSDH recurrences. However, following the introduction of subdural drainage, re-operation rates dropped to approximately 10%. The standard surgical technique includes burr-hole craniostomy, followed by intraoperative irrigation and placement of subdural drainage. Yet, the role of intraoperative irrigation has not been established. If there is no difference in recurrence rates between intraoperative irrigation and no irrigation, CSDH surgery could be carried out faster and more safely by omitting the step of irrigation. The aim of this multicentre randomised controlled trial is to study whether no intraoperative irrigation and subdural drainage results in non-inferior outcome compared to intraoperative irrigation and subdural drainage following burr-hole craniostomy of CSDH.

**Methods and Analysis:** This is a prospective, randomised, controlled, parallel group, non-inferiority multicentre trial comparing single burr-hole evacuation of CSDH with intraoperative irrigation and evacuation of CSDH without irrigation. In both groups, a passive subdural drain is used for 48 hours as a standard of treatment. The primary outcome is symptomatic CSDH recurrence requiring re-operation within six months. The predefined non-inferiority margin for the primary outcome is 7.5%. To achieve a 2.5% level of significance and 80% power we will randomise 270 patients per group. Secondary outcomes include modified Rankin Scale, rate of mortality, duration of operation, length of hospital stay, adverse events, and change in volume of CSDH.

**Ethics and Dissemination:** The study was approved by the institutional review board of the Helsinki and Uusimaa Hospital District (HUS/3035/2019 §238) and duly registered at ClinicalTrials.gov. We will disseminate the findings of this study through peer-reviewed publications and conference presentations.

**Trial Registration Number:** NCT04203550

## STRENGTHS AND LIMITATIONS OF THIS STUDY

- This is a multicentre nationwide prospective randomised controlled trial, with a pragmatic trial design to increase generalizability.
- The study was designed in collaboration with patient organisation experts.
- The health care system in Finland facilitates the follow-up of patients (particularly with respect to our primary outcome, symptomatic CSDH requiring reoperation) as CSDH surgery is centralized to the five neurosurgical departments participating in the trial.
- Although the surgeon performing the surgery obviously cannot be blinded to the group assignment, we have tried to maintain the masking of the treatment allocation by not disclosing it in the health care records.

## INTRODUCTION

Chronic subdural haematoma (CSDH) is the most common type of intracranial haemorrhage and one of the most common clinical diagnoses necessitating neurosurgical treatment. CSDHs are typically caused by minor head trauma and consecutive tearing of bridging veins, leading to a haemorrhage in between the dura mater and the arachnoid membrane. The delay in the actual diagnosis of CSDH can be quite substantial due to the difficulty of the diagnosis in the early phase when neurological symptoms – such as progressive headache, mental deterioration or confusion, or deterioration of the patient's overall health – are quite unspecific. However, when the disease progresses and causes more direct compression to the underlying brain tissue, more specific progressive neurological signs ensue, including motor and sensory deficits, dysphasia and epileptic seizures, and the diagnosis becomes more evident. If left untreated, CSDH may also lead to loss of consciousness or even death. The definite diagnosis of CSDH is most commonly based on computed tomography (CT) or magnetic resonance imaging (MRI) of the brain. On a CT scan, CSDH is usually of hypo- or isodense character and will feature a concavo-convex shape between the skull and the cortex.

For symptomatic CSDHs, the treatment is operative. The mainstay of treatment includes burr-hole craniostomy and intraoperative intracranial irrigation followed by subdural drainage [1]. With current treatment strategies, the recurrence rate after CSDH treatment is approximately 10% [2]. Low risk of bias evidence exists on the role of subdural drain in recurrence rate reduction but the role of intraoperative irrigation is more controversial. Our literature review revealed a total of ten studies assessing the effect of intraoperative irrigation: only one study employed a randomised study protocol [3] while the others were retrospective analyses. Sample sizes ranged from 56 to 186 patients, and the most commonly used outcome was the rate of haematoma recurrence. Of these ten studies, two studies found that intraoperative irrigation was associated with a significantly lower recurrence rate in comparison to no intraoperative irrigation [4,5], six studies found no difference in recurrence rates between intraoperative and no intraoperative irrigation [3,6–10], and two studies found that no intraoperative irrigation was associated with a significantly lower recurrence rate compared to irrigation [11,12].

It is possible that intraoperative irrigation is an unnecessary prolongation of the surgical procedure, thereby increasing the risk for infections, rebleeding and the stress levels of patients undergoing the procedure under local anaesthesia. There is also evidence to suggest that irrigation *per se* may be harmful: There are reports of increased risk of treatment-associated morbidity and complications such as postoperative pneumocephalus [9,11,13] and also of direct irrigation-induced intracerebral and subarachnoid haemorrhage [14].



1  
2  
3  
4  
5 We designed a pragmatic, parallel group, randomised, controlled multicentre non-inferiority trial to compare  
6 the use of intraoperative irrigation with no intraoperative irrigation for the operation of symptomatic CSDH  
7 (by burr-hole craniostomy and subdural drainage for 48 hours). We hypothesise that a treatment that involves  
8 no intraoperative irrigation results in non-inferior outcome compared to a treatment that involves  
9 intraoperative irrigation. Non-inferiority of the new treatment (no irrigation) with respect to the gold standard  
10 treatment (irrigation) is of interest on the premise that the new treatment has some other advantages, such  
11 as shorter operative time and therefore reduced stress to patient, reduced cost, fewer adverse events (harm)  
12 and technically more simple [15]. We consider non-inferiority proven if the rate of recurrence in the no-  
13 irrigation group is within the pre-defined non-inferiority margin of the rate observed in the irrigation group  
14 together with no significantly increased risk of harm.  
15  
16  
17  
18  
19  
20  
21  
22  
23  
24  
25  
26  
27  
28  
29  
30  
31  
32  
33  
34  
35  
36  
37  
38  
39  
40  
41  
42  
43  
44  
45  
46  
47  
48  
49  
50  
51  
52  
53  
54  
55  
56  
57  
58  
59  
60

# MATERIALS AND ANALYSIS

## Overview of study design

FINISH is a multicentre, prospective non-inferiority randomised controlled trial, with the primary objective to compare intraoperative irrigation to no irrigation in the treatment of CSDH by single burr-hole craniostomy and subdural drainage. Except for randomisation to irrigation versus no irrigation, the management of study participants will not differ. Eligible participants are block randomised in a 1:1 allocation rate to one of two arms: i) intraoperative irrigation, or ii) no intraoperative irrigation.

The study is registered at ClinicalTrials.gov (NCT04203550) and this protocol has been written according to the Standard Protocols Items: Recommendations for Interventional Trials (SPIRIT) guidelines for reporting a randomised controlled trial study protocol (the SPIRIT Figure and Checklist are available as Additional File 1) [16]. A summary of the trial is shown in Additional File 2.

## Study settings

Participating sites are the neurosurgical departments at Helsinki University Hospital (Helsinki, Finland), Kuopio University Hospital (Kuopio, Finland), Tampere University Hospital (Tampere, Finland), Turku University Hospital (Turku, Finland) and Oulu University Hospital (Oulu, Finland). All these five units are tertiary referral centres and the only units delivering neurosurgical care in Finland.

## Participant selection and recruiting process

We will screen all patients who are referred for CSDH surgery to the aforementioned departments of neurosurgery for trial eligibility. A standard clinical examination and a brain CT or MRI examination will be performed. Patients with clinical and imaging findings consistent with a diagnosis of symptomatic CSDH and considered to benefit from operative treatment of CSDH by single burr-hole evacuation will be asked to participate in the trial.

## Inclusion criteria

- Patients with a symptomatic unilateral or bilateral CSDH requiring burr-hole evacuation
  - o Predominantly hypodense or isodense on imaging (CT/MRI)
  - o Clinical symptoms correlating with the CSDH
  - o Patients with bilaterally operated CSDHs will be treated with the same protocol on both sides and analysed as a single study participant
- Patients older than 18 years of age

## Exclusion criteria

- CSDH requiring surgical treatment other than burr-hole evacuation (e.g. craniotomy)
- CSDH in a patient who has a cerebrospinal fluid shunt
- Patients who have undergone any prior intracranial surgery
- Comatose patients (GCS 8 or lower, absent motor responses to painful stimuli; decerebrate or decorticate posturing), where rapid hematoma evacuation is required
- Patient's postoperative cooperation is suspected to be insufficient for drain usage (i.e. disoriented or semiconscious patient)
- Patient who has received active treatment for a haematogenic malignancy within the previous five years
- Patient with a central nervous system malignancy or tumour that may cause the patient's current symptoms or may interfere with the operation. For example, a small incidental meningioma without associated brain oedema, not in the vicinity of the planned burr-hole, is not an exclusion criterion.
- Patient has an acute infection that requires antibiotic treatment
- Patient has a high risk of life-threatening thrombosis (e.g. recent coronary stent, intracranial stent, recent pulmonary embolism, low pressure cardiac valve replacement [mitral- or tricuspid valve replacement]) and discontinuation of antithrombotic medication is not recommended

## Informed consent

At the first appointment in the emergency department or the neurosurgical ward, the attending neurosurgeon will provide the patients with detailed written and oral information on the trial and ask patients to sign an informed consent form. Withdrawal from the study is possible at any time, without affecting the course of conventional treatment, in accordance with the latest version of the declaration of Helsinki 2013 [17].

Due to the nature and emergency aspects of the disease (mass effect on the brain causing confusion and disorientation, lowered level of consciousness requiring urgent surgery), some patients will not be able to give

1  
2  
3 written consent prior to randomisation. If the patient is unable to give written consent prior to the  
4 randomisation, delayed consent will be sought. In these cases, oral consent will be obtained from the next of  
5 kin after providing information regarding the trial. Following oral consent from the next of kin, the patient can  
6 be randomised. Following randomisation and surgery, written consent will primarily be obtained from the  
7 patient. However, in case of the patient being unable to give written consent due to neurological disability,  
8 written consent is obtained from the next of kin. In these cases, the next of kin has the right to withdraw the  
9 patient's consent at any time. Patients who are eligible for the trial but are not willing to undergo  
10 randomisation will be asked to be included in a simultaneous, pragmatic follow-up cohort.  
11  
12

13  
14  
15 Participants will be asked to sign the local Biobank agreements in order to collect and store subdural fluid  
16 samples (see below) and two venous blood samples (2 x 10 ml).  
17  
18  
19  
20  
21  
22

## 23 Collected data

24  
25  
26  
27 We will document data in the electronic Case Report Form (eCRF) preoperatively, intraoperatively and within  
28 48–72h postoperatively, as well as at 6 weeks ( $\pm 2$  weeks) and at 6 months (see Table 1 for table of events). All  
29 patients' preoperative and postoperative head CTs or MRs images will be sent to the Picture Archiving and  
30 Communication System (PACS) of the methods centre (Helsinki University Hospital) for analysis. Ten percent  
31 of all images will be double read by independent assessors blinded to other patient information. To preserve  
32 confidentiality, all participants are allocated a unique study identifier during the recruitment process, which is  
33 used on all data collection forms. All study documentation is held in secure offices, and the study researchers  
34 operate according to a signed code of confidentiality. All data are entered into a password-secured database  
35 by the data managers.  
36  
37  
38  
39  
40  
41  
42  
43  
44

## 45 Surgical technique

46  
47  
48 Current management of CSDHs at all participating centres includes single burr-hole evacuation with  
49 intraoperative irrigation followed by passive subdural drainage. As a routine, all burr-hole craniostomies are  
50 performed under local anaesthesia, often combined with intravenous sedation with benzodiazepines and/or  
51 opioids during the operation. General anaesthesia is only used if the neurosurgeon or the anaesthesiologist  
52 considers it unsafe to perform the procedure under local anaesthesia. Routine preoperative antibiotic is given  
53 according to local protocols (normally a second-generation cephalosporin 30–60 min prior to incision).  
54 Typically, the surgeon drills one 14-mm burr hole over the maximum convexity of the CSDH. In case of bilateral  
55 CSDHs, the surgeon performs the same procedure on both sides. If irrigation is utilized, after opening the dura,  
56  
57  
58  
59  
60

1  
2  
3 the surgeon irrigates the subdural collection with warm (body temperature) Ringer's lactate saline until rinsing  
4 appears clear or at least 200 ml (in case of bilateral CSDH, 200 ml per side, i.e. 400 ml total). After that, the  
5 surgeon will insert the subdural drain 3–5 cm deep and parallel to skull. The position of the drain (anterior,  
6 posterior) is left to the discretion of the physician. Burr hole covers or haemostatics are not routinely used  
7 (e.g. Spongostan®, Tachosil®). The type of subdural drain is not standardized, but all study centres use 10F  
8 drains. Following drain insertion, the distal end is tunnelled approximately 4–5 cm from the incision and  
9 connected to a passive ventricular drainage bag (through a non-return valve) and the skin incision is closed in  
10 two layers (normally is absorbable 3-0 suture for subcutis/galea and non-absorbable 4-0 suture for skin). The  
11 drain is fixed to the skin in a secure way. The drain-to-skin fixation technique is left to the discretion of the  
12 operating surgeon. The drainage bag is positioned at bed level. The duration of subdural drainage is 48 hours  
13 ( $\pm 12$  hours) [18,19]. Patient mobilization is allowed during drainage (drain is kept open). Prophylactic  
14 antibiotics during drainage are not routinely used.

## 25 Randomisation

26  
27  
28  
29 Patients will be randomised in a 1:1 allocation ratio stratified only by study centre. We will use a random block  
30 randomisation technique, with a random block size of 4, 6 or 8. A member of the FINISH study group will carry  
31 out randomisation when the patient is at the OR at the beginning of the operation. The randomisation will  
32 occur just prior to skin incision. The randomisation is a built-in property in the online eCRF form system used  
33 in the trial (provided by Granitics Inc., Espoo, Finland).

## 39 Intervention

### 43 *Irrigation group (IR)*

44  
45 A burr-hole craniostomy is performed as described earlier. The dura is opened sharply and 10 ml of subdural  
46 exudate is aspirated with blunt aspiration needle for a CSDH sample to be stored at  $-75^{\circ}\text{C}$  to be used for later  
47 analysis. Subdural space is irrigated by repeated rinsing with body temperature saline solution with a syringe  
48 and blunt needle until surgeon considers exudate to be clear. Minimum volume of irrigation will be 200 ml per  
49 operated side. The subdural drain is inserted 3–5 cm underneath the skull and parallel to it. Thereafter,  
50 operation is completed as described earlier. The total volume of irrigation as well as the duration of operation  
51 is recorded.

### ***No-irrigation group (N-IR)***

A burr-hole craniostomy is performed as described earlier. A small incision in the dura is made and 10 ml of subdural exudate is aspirated with a blunt aspiration needle for a CSDH sample to be stored at -75°C to be used for later analysis. The subdural drain is inserted approximately 3–5 cm underneath the skull and parallel to it. Thereafter, the operation is completed as described earlier. The duration of the operation is recorded.

## **Blinding**

Due to the nature of the treatment, it is not possible to blind the surgeon and OR staff from the treatment allocation. Measures to minimize bias include:

- The randomisation is timed as closely as possible to the time of surgery (just prior to skin incision)
- The patient will not be informed of treatment allocation
- Treatment allocation will not be documented in medical records (i.e. all personnel participating in patient care after the operation will be blinded to allocation)
- The study group members collecting postoperative data, outcome data, imaging data and performing the statistical analyses will be blinded to treatment arm over the entire course of the trial, until the data analyses are carried out.
- The primary and secondary outcome measures (see below) are all evaluated in blinded matter, i.e. the outcome assessor will be blinded with regard to treatment allocation

Emergency unblinding will occur only in exceptional circumstances when requested by the patient's clinical team (e.g. need to treat a serious adverse event [SAE]), when knowledge of the actual treatment is essential for further management of the patient.

## **Compliance to treatment allocation and possible crossover**

The per protocol treatment is 0 ml of intracranial irrigation in the N-IR group and  $\geq 200$  ml (per operated side) of intracranial irrigation in the IR group. In the event of protocol breach, crossovers will be handled as follows:

- If the patient is randomised to the IR group and the intracranial irrigation volume is between 1 ml and 200 ml, the patient is not considered a crossover.
- If the patient is randomised to the IR group and the intracranial irrigation volume is 0 ml, the patient is considered a crossover (belongs to the N-IR group).

- If the patient is randomised to the N-IR group and 1 ml to 199 ml of intracranial irrigation is used, the patient is not considered a crossover.
- If the patient is randomised to the N-IR group and  $\geq 200$  ml of intracranial irrigation is used, the patient is considered a crossover (belongs to the IR group).
- In case of intervention failure (e.g. not being able to insert subdural drain, intended or unintended drain removal before 36h), the patient is not considered a crossover.

## Primary outcome measure

Our primary outcome measure is the rate of reoperations of ipsilateral CSDHs within 6 months.

## Indication for reoperation and reoperation technique

The decision to proceed to reoperation is made by the treating neurosurgeon and will be made by the same indications as the primary operation (i.e. symptom recurrence or insufficient resolution of clinical symptoms correlating to imaging findings [CT or MR imaging] of CSDH). All reoperations will be conducted according to the current standard (i.e. burr-hole with irrigation and subdural drain placement). In case of recurrence requiring reoperation, unblinding will not occur automatically, only in cases when the neurosurgery team treating the patient considers this information necessarily for optimal care of the patient.

## Secondary outcome measures

The study is not powered for secondary outcome measure comparisons and these outcomes (analyses) will be considered exploratory. The secondary outcomes include:

1. Modified Rankin Scale at 6 months after operation
2. Mortality within 6 months of operation
3. Duration of the operation
4. Hospital length of stay (index hospital and need for further care)
5. CSDH volume reduction at 2 months after operation

## Safety endpoints

1  
2  
3 Safety endpoints within 6-months of operation, including the number and severity of adverse events (AE)  
4 and procedure related adverse events (PRAE). Adverse events are categorized as serious adverse events  
5 (SAE) and minor adverse events (MAE). Procedure related (severe and minor) adverse events will be  
6 reported separately.  
7  
8  
9

10  
11 SAE are defined as any inappropriate medical occurrence or effect that results in death, is life-threatening,  
12 requires hospitalization or prolongation of an existing inpatient hospitalization, results in persistent or  
13 significant disability or incapacity, or is another important medical event.  
14  
15

- 16 • Life-threatening in the definition of SAE refers to an event when the patient was at risk of  
17 death at the time of the event and does not refer to an event where the event might have  
18 hypothetically caused death. Prolonged hospitalization due to delayed transfer will not be  
19 considered an AE or SAE.  
20  
21

22 Examples of SAEs are death, acute myocardial infarction, pulmonary embolism, systemic  
23 infection, acute cerebral infarction (PRAE), intracranial infection (PRAE), epileptic seizures  
24 (PRAE) and acute postoperative intracranial haematoma (PRAE).  
25  
26  
27  
28  
29

30 MAE are defined as clinically mild manifestations, referent to that the patient might be aware of the  
31 event or symptom but the event or symptom is easily tolerated by the patient.  
32

- 33 • Examples of MAEs are local wound infection manageable with oral antibiotics (PRAE),  
34 abnormal skin bleeding from the wound (PRAE), other local infection manageable with oral  
35 antibiotics and deep venous thrombosis not causing pulmonary embolism.  
36  
37  
38  
39

## 40 41 Follow-up

42  
43  
44 The follow-up period is 6 months. We will arrange a clinical outpatient follow-up visit for all patients at 4–8  
45 weeks postoperatively (6 weeks  $\pm$ 2 weeks). Before that, a postoperative brain CT will be performed. If the  
46 patient was preoperatively using any form of antithrombotic medication, the medication is not routinely  
47 restarted without reasonable clinical indication before the control brain CT. All recurrences requiring surgery  
48 within 6 months and complications within 6 months will be recorded. At 6 months, functional outcome (mRS)  
49 will be assessed by a FINISH study group member by phone interview. Further, for each patient, mortality will  
50 be verified through the Finnish Official Cause-of-Death Statistics at 6 months. This statutory register is virtually  
51 100% complete because each death, its associated official death-certificate, and the corresponding person  
52 information in the Finnish computerized population register are cross-checked.  
53  
54  
55  
56  
57  
58  
59  
60



## Sample size

The trial is designed to ascertain whether drain without irrigation is non-inferior to drain with irrigation, with the rate of reoperations of ipsilateral CSDHs within 6 months as the primary outcome. We based the standard rate of reoperations (9.6%) on the results from a recent Cochrane review that reported the recurrence rates after CSDH evacuation followed by subdural drainage in six RCTs with more than 30 patients per treatment arm [2]. This yielded a maximum allowed margin of 9.0% to achieve non-inferiority. Following a consensus meeting with the trial investigators, the non-inferiority margin was lowered to 7.5%. Thus, with a non-inferiority margin of 7.5%, a 2.5% level of statistical significance ( $\alpha = 0.025$ ) and an 80% power ( $\beta = 0.20$ ), we will need 243 patients per study group [20]. Accounting for a drop-out rate of 10%, required group size increases to 270 per study group. Accordingly, we set the recruitment target at 540 patients.

## Data management

All study data will be stored in an eCRF provided by Granitics Inc (Espoo, Finland). Data are entered locally by the local research team. Upon receipt of the data, the FINISH personnel, blinded to the group allocation, will make a visual check of the data and query all missing, implausible and inconsistent data. Hospital patient records will also be utilized to collect missing data and to interpret inconsistent or implausible data. Participant files will be maintained in storage (both in electronic and paper format) at the coordinating centre for a period of 15 years after completion of the study.

## Data sharing

Data generated by our study will be made available as soon as possible and will be available upon reasonable request. Data access requests will be reviewed by the FINISH steering group. Requestors will be required to sign a Data Access Agreement. Only anonymized data will be shared.

## Statistical analysis

The statistical analysis will be performed both according to intention-to-treat (ITT) and per protocol (PP) principles. We will claim non-inferiority of single burr-hole evacuation without irrigation and subdural drainage only if this outcome is supported both by the ITT and the PP analysis. The ITT analysis will be performed using the full analysis set (FAS), defined as all randomised patients in the groups allocated to by the randomisation.

1  
2  
3 No exclusions other than caused by missing information will be made. No imputation will take place. The PP  
4 analysis will be performed on the subset of FAS that is compliant with the protocol have a completed  
5 treatment, available measurements, and neither major protocol violations nor entry criteria violations.  
6  
7

8  
9 Summary statistics will be presented for both groups. Continuous variables will be presented in terms of mean  
10 values or medians with standard deviations and interquartile ranges, respectively. Categorical variables will  
11 be presented with relative frequencies in percent.  
12  
13

14  
15 The results from the statistical analysis will be considered to support a claim of non-inferiority if the upper  
16 limit of a one-sided 97.5% confidence interval (or equivalently a 95% two-sided confidence interval) excludes  
17 a difference in the primary endpoint in favour of the irrigation group of more than 7.5%. The centre  
18 stratification of the randomisation will be accounted for in the calculation of the confidence interval.  
19  
20  
21

22  
23 Exploratory analyses of secondary and other binary endpoints will be performed using the Chi-squared test or  
24 logistic regression analysis. Continuous outcomes will be analysed using Student's t-test or ANCOVA. Potential  
25 effect modifiers (patient age, unilateral versus bilateral CSDH, use of antithrombotic medication, preoperative  
26 mRS and preoperative clinical status, haematoma density, haematoma size and presence of membranes on  
27 preoperative imaging) will be analysed by including interaction terms in statistical models.  
28  
29  
30  
31

32  
33 The primary endpoint will be investigated as described above using a confidence interval, which is equivalent  
34 to using a non-inferiority test with a one-sided p-value of 0.025 (or a two-sided of 0.05). The statistical testing  
35 of other endpoints will also be performed using a two-sided significance level of 0.05. The statistical analysis  
36 will be performed using appropriate statistical software packages.  
37  
38  
39

40  
41 Prior to the statistical analysis, a statistical analysis plan will be finalised and an independent statistician will  
42 approve a dataset with sufficient data quality for the statistical analysis. Another statistician blinded to  
43 treatment arm will perform the analyses.  
44  
45  
46  
47

### 48 ***Blinded data interpretation***

49 As in previous studies [21,22], we will interpret the results of the trial according to a blinded data  
50 interpretation scheme [23]. In brief, an independent statistician will provide the Writing Committee of the  
51 FINISH trial with blinded results from the analyses with the groups labelled group A and group B. The Writing  
52 Committee will then contemplate the interpretation of the results until a consensus is reached and all  
53 alternative interpretations of the findings are agreed upon in writing. Once a consensus is reached, we will  
54 record the minutes of this meeting in a document coined "statement of interpretation", which will be signed  
55 by all members of the Writing Committee. Only after reaching this common agreement will the data manager  
56  
57  
58  
59  
60

1  
2  
3 and independent statistician break the randomisation code and the correct interpretation chosen. A  
4 manuscript will then be prepared and finalized for the publication of the results. Detailed minutes of blinded  
5 data interpretation meetings will be provided as a supplement to the trial manuscript.  
6  
7  
8  
9

## 10 **Patient and public involvement**

11  
12  
13  
14 To achieve a more patient-friendly design for our trial, we recruited five patient experts from the European  
15 Patients' Academy on Therapeutic Innovation (EUPATI Finland, <https://fi.eupati.eu/>) while designing the  
16 study. They were asked to review the informed consent form and questionnaires of the study. Further, these  
17 experts were asked to assess the burden of the intervention, time required to participate in the study, and  
18 outcomes all of which they estimated to be reasonable. After the FINISH study is completed, we will deliberate  
19 together with EUPATI Finland on how to share the study results with the general public.  
20  
21  
22  
23  
24  
25

## 26 **Data Safety and Monitoring Committee**

27  
28  
29  
30 Study monitoring is provided by the Clinical Research Institute of Helsinki University Hospital, who will ensure  
31 the quality of data collection and trial integrity. The monitoring is performed in accordance with currently valid  
32 rules and regulations, Good Clinical Practice (ICH-GCP) and the standardized instructions of the Clinical  
33 Research Institute Helsinki University Hospital.  
34  
35  
36  
37

38 The members of the Data Safety and Monitoring Committee (DSMC) are neurosurgeons independent of the  
39 trial and have neither financial nor scientific conflicts of interest with the trial. The DSMC will oversee the  
40 interim analyses. The purpose of the interim analysis is safety surveillance. The interim analyses are performed  
41 after 50, 100 and 200 patients. No efficacy-related early stopping is planned.  
42  
43  
44  
45  
46  
47

## 48 **Ethics and dissemination**

49  
50  
51 The study was approved by the institutional review board (IRB) of the Helsinki and Uusimaa Hospital District  
52 on November 13, 2019 (HUS/3035/2019 §238, updated 26.2.2020) and duly registered at ClinicalTrials.gov  
53 (NCT04203550).  
54  
55  
56  
57  
58  
59  
60

1  
2  
3 All participating centres will obtain local institutional research approvals for the consent form template, the  
4 eCRF and any additional protocol amendments. Any protocol amendment will be communicated to the site  
5 investigators, the IRB, trial participants and trial registries as necessary.  
6  
7  
8  
9

10 Information about the study participants will be kept confidential and will be managed in accordance with the  
11 following rules: 1) all study-related information is stored securely at the clinical sites, 2) all possible study  
12 participant information in paper form is stored in locked file cabinets and is accessible only to study personnel,  
13 3) all CRFs are identified only by a coded patient number, 4) all records that contain patient names or other  
14 identifying information are stored separately from the study records that are identified only by the coded  
15 patient number and 5) all local databases are password protected.  
16  
17  
18  
19  
20

21 The results of the study will be published in an international journal and presented at (inter)national  
22 congresses. Trial results will be disseminated to the public in collaboration with EUPATI Finland.  
23  
24  
25  
26  
27  
28  
29  
30  
31  
32  
33  
34  
35  
36  
37  
38  
39  
40  
41  
42  
43  
44  
45  
46  
47  
48  
49  
50  
51  
52  
53  
54  
55  
56  
57  
58  
59  
60

## DISCUSSION

To the best of our knowledge, this is the first large scale multicentre RCT comparing intraoperative irrigation with no intraoperative irrigation after burr-hole craniostomy and subdural drain placement for CSDH. The incidence of CSDH in Finland is approximately 18/100,000, reaching as high as 130/100,000 in persons over 80 years old [24]. As a consequence of the ageing population, more frequent use of antithrombotic medication and the improved access to diagnostics in most high-income countries, the incidence of CSDH is expected to increase in the future [25]. The risk of complications following CSDH is rather low, but reducing the risk of recurrence is essential to avoid over-hospitalization of otherwise fragile patients, which could be detrimental [26]. Current studies examining strategies to decrease risk of recurrence include the Swedish study of irrigation-fluid temperature in the evacuation of chronic subdural haematoma (SIC!) [27], the Dutch dexamethasone therapy versus surgery for chronic subdural haematoma (DECSA trial) [28], the British dexamethasone for adult patients with a symptomatic chronic subdural haematoma (Dex-CSDH) trial [29], and two Canadian studies looking at the role of tranexamic acid in the treatment of chronic subdural haematomas (TRACS trial, NCT02568124 [30] and TRACE trial, NCT03280212).

A multicentre RCT that could show a decrease in recurrence rates has the potential to set a new gold standard of therapy, which would influence the treatment of these patients all over the world. If subdural irrigation fails to show any benefit over no irrigation, it would translate to a reduction in the risk of iatrogenic surgical complications and shortened operation times. It may also enable opportunities to develop newer, minimally invasive surgical techniques, including only subdural drain placement. This would not only benefit the individual patient but also health care systems all over the world, considering the sharply increasing incidence of CSDH.

A major strength of the study is that the five participating centres cover 100% of the Finnish population in terms of provision of neurosurgical care. In Finland, the surgical treatment of CSDH is exclusively carried out in University Hospital clinics, meaning that the follow-up regarding the primary endpoint (recurrence) should be 100%. Also, in a highly digitalized healthcare system (local electronic healthcare databases since the early 2000s and nationwide electronic healthcare database since 2010) where every citizen has a unique personal identification number, the chances for successful follow-up regarding other endpoints is extremely high. A limitation is that it is impossible to blind the treating surgeon in relation to the treatment arm (irrigation or no irrigation). Furthermore, we cannot adjust for subtle differences in surgical technique between surgeons, although all participating centres as a whole perform the surgeries similarly. For example, the normal surgical

1  
2  
3 technique involves irrigation until the fluid is deemed to be clear. However, in order to ensure a sufficient  
4 amount irrigation, we set a minimum threshold of 200 ml (per side).  
5  
6  
7

## 8 9 **TRIAL STATUS**

10  
11  
12 The trial started recruiting patients in January 2020 in Helsinki and the other centres will start recruiting during  
13 the spring of 2020.  
14  
15

## 16 17 **CONTRIBUTORSHIP STATEMENT**

18  
19  
20 Kimmo Lönnrot, Rahul Raj, Christoph Schwartz, Riku Kivisaari, Jarno Satopää, Teemu Luostarinen, Teppo  
21 Järvinen and Simo Taimela designed the trial. Pihla Tommiska, Rahul Raj, Christoph Schwartz, Teemu  
22 Luostarinen, Jarno Satopää, Simo Taimela, Teppo Järvinen, Janek Frantén, Jonas Ranstam, Jussi Posti, Teemu  
23 Luoto, Ville Leinonen, Sami Tetri, Timo Koivisto and Kimmo Lönnrot have been involved in drafting the  
24 manuscript or revising it critically for important intellectual content. All authors read and approved the final  
25 manuscript.  
26  
27  
28  
29  
30  
31

## 32 33 **COMPETING INTERESTS**

34 None  
35  
36  
37

## 38 39 **FUNDING**

40 This study was supported by the State funding for university-level health research (Helsinki University  
41 Hospitals), Finska Läkaresällskapet, Medicinska Understödsföreningen Liv & Hälsa. The funding source will  
42 have no role in the collection, analysis and interpretation of data; in the writing of the report and in the  
43 decision to submit the article for publication.  
44  
45  
46  
47  
48  
49  
50  
51  
52  
53  
54  
55  
56  
57  
58  
59  
60

## REFERENCES

1. Koliaas AG, Chari A, Santarius T, Hutchinson PJ. Chronic subdural haematoma: modern management and emerging therapies. *Nat Rev Neurol* [Internet]. Nature Publishing Group; 2014 [cited 2019 Jun 10];10:570–8. Available from: <http://www.nature.com/articles/nrneurol.2014.163>
2. Peng D, Zhu Y. External drains versus no drains after burr-hole evacuation for the treatment of chronic subdural haematoma in adults. *Cochrane Database Syst Rev* [Internet]. John Wiley & Sons, Ltd; 2016 [cited 2019 Sep 19]; Available from: <http://doi.wiley.com/10.1002/14651858.CD011402.pub2>
3. Gurelik M, Aslan A, Gurelik B, Ozum U, Karadag Ö, Kars HZ, et al. A Safe and Effective Method for Treatment of Chronic Subdural Haematoma. *Can J Neurol Sci* [Internet]. 2007 [cited 2019 Jun 10];34:84–7. Available from: <http://www.ncbi.nlm.nih.gov/pubmed/17352353>
4. Lee C, Park DS, Song SW, Chun Y II, Cho J, Moon CT, et al. Effect of Intra-operative Saline Irrigation during Burr Hole Surgery on the Recurrence for Chronic Subdural Hematomas. *The Nerve* [Internet]. Korean Society of Peripheral Nervous System; 2015 [cited 2019 Jun 10];1:26–9. Available from: <http://thenerve.net/journal/view.php?doi=10.21129/nerve.2015.1.1.26>
5. Jang K-M, Kwon J-T, Hwang S-N, Park Y-S, Nam T-K. Comparison of the Outcomes and Recurrence with Three Surgical Techniques for Chronic Subdural Hematoma: Single, Double Burr Hole, and Double Burr Hole Drainage with Irrigation. *Korean J neurotrauma* [Internet]. Korean Neurotraumatology Society; 2015 [cited 2019 Apr 9];11:75–80. Available from: <http://www.ncbi.nlm.nih.gov/pubmed/27169069>
6. Iftikhar M, Siddiqui UT, Rauf MY, Malik AO, Javed G. Comparison of Irrigation versus No Irrigation during Burr Hole Evacuation of Chronic Subdural Hematoma. *J Neurol Surg A Cent Eur Neurosurg* [Internet]. 2016 [cited 2019 Jun 10];77:416–21. Available from: <http://www.thieme-connect.de/DOI/DOI?10.1055/s-0035-1564049>
7. Ishibashi A, Yokokura Y, Adachi H. A Comparative Study of Treatments for Chronic Subdural Hematoma: Burr Hole Drainage versus Burr Hole Drainage with Irrigation. *Kurume Med J* [Internet]. 2011 [cited 2019 Apr 9];58:35–9. Available from: <https://www.ncbi.nlm.nih.gov/pubmed/?term=Ishibashi+A%2C+Yokokura+Y%2C+Adachi+H.+A+comparative+study+of+treatments+for+chronic+subdural+hematoma%3A+burr+hole+drainage+versus+burr+hole+drainage+with+irrigation.+Kurume+Med+J.+2011%3B58%3A35-9>
8. Suzuki K, Sugita K, Akai T, Takahata T, Sonobe M, Takahashi S. Treatment of chronic subdural hematoma by closed-system drainage without irrigation. *Surg Neurol* [Internet]. Elsevier; 1998 [cited 2019 Jun 10];50:231–4. Available from: <https://www.sciencedirect.com/science/article/pii/S009030199700339X?via%3Dihub>
9. Wang Q-P, Yuan Y, Guan J-W, Jiang X-B. A comparative study of irrigation versus no irrigation during burr hole craniostomy to treat chronic subdural hematoma. *BMC Surg* [Internet]. BioMed Central; 2017 [cited 2019 Jun 19];17:99. Available from: <http://www.ncbi.nlm.nih.gov/pubmed/28893217>
10. Zakaraia AM, Adnan JS, Haspani MSM, Naing NN, Abdullah JM. Outcome of 2 different types of operative techniques practiced for chronic subdural hematoma in Malaysia: an analysis. *Surg Neurol* [Internet]. Elsevier; 2008 [cited 2019 Jun 10];69:608–15. Available from: <https://www.sciencedirect.com/science/article/pii/S0090301907001978?via%3Dihub>
11. Kim DH, Kim HS, Choi HJ, Han IH, Cho WH, Nam KH. Recurrence of the Chronic Subdural Hematoma after Burr-Hole Drainage with or without Intraoperative Saline Irrigation. *Korean J neurotrauma* [Internet]. Korean Neurotraumatology Society; 2014 [cited 2019 Jun 10];10:101–5. Available from: <http://www.ncbi.nlm.nih.gov/pubmed/27169042>
12. Kuroki T, Katsume M, Harada N, Yamazaki T, Aoki K, Takasu N. Strict closed-system drainage for treating chronic subdural haematoma. *Acta Neurochir (Wien)* [Internet]. 2001 [cited 2019 Apr 9];143:1041–4. Available from: <https://link.springer.com/content/pdf/10.1007/s007010170010.pdf>
13. Ihab Z. Pneumocephalus after surgical evacuation of chronic subdural hematoma: Is it a serious complication? *Asian J Neurosurg* [Internet]. Wolters Kluwer -- Medknow Publications; 2012 [cited 2019 Jun 20];7:66–74. Available from: <http://www.ncbi.nlm.nih.gov/pubmed/22870154>

14. Seung W-B, Jeong JH. Postoperative Subarachnoid Hemorrhage and Multipunctate Intracerebral Hemorrhages Following Evacuation of Bilateral Chronic Subdural Hematomas. *Korean J neurotrauma* [Internet]. Korean Neurotraumatology Society; 2017 [cited 2019 Jun 20];13:149–52. Available from: <http://www.ncbi.nlm.nih.gov/pubmed/29201851>
15. Piaggio G, Elbourne DR, Pocock SJ, Evans SJW, Altman DG, CONSORT Group for the. Reporting of Noninferiority and Equivalence Randomized Trials. *JAMA* [Internet]. American Medical Association; 2012 [cited 2019 Sep 20];308:2594. Available from: <http://jama.jamanetwork.com/article.aspx?doi=10.1001/jama.2012.87802>
16. Chan AW, Tetzlaff JM, Gøtzsche PC, Altman DG, Mann H, Berlin JA, et al. SPIRIT 2013 explanation and elaboration: guidance for protocols of clinical trials. *BMJ*. 2013;346.
17. World Medical Association declaration of Helsinki: Ethical principles for medical research involving human subjects. *JAMA - J. Am. Med. Assoc.* 2013.
18. Santarius T, Kirkpatrick PJ, Ganesan D, Chia HL, Jalloh I, Smielewski P, et al. Use of drains versus no drains after burr-hole evacuation of chronic subdural haematoma: a randomised controlled trial. *Lancet*. 2009;
19. Glancz LJ, Poon MTC, Coulter IC, Hutchinson PJ, Koliass AG, Brennan PM, et al. Does Drain Position and Duration Influence Outcomes in Patients Undergoing Burr-Hole Evacuation of Chronic Subdural Hematoma? Lessons from a UK Multicenter Prospective Cohort Study. *Neurosurgery* [Internet]. Narnia; 2018 [cited 2019 Sep 19];85:486–93. Available from: <https://academic.oup.com/neurosurgery/advance-article/doi/10.1093/neuros/nyy366/5086667>
20. Blackwelder WC. “Proving the Null Hypothesis” in Clinical Trials. *Control Clin Trials*. Elsevier; 1982;3:345–53.
21. Sihvonen R, Paavola M, Malmivaara A, Itala A, Joukainen A, Nurmi H, et al. Arthroscopic partial meniscectomy versus sham surgery for a degenerative meniscal tear. *N Engl J Med*. United States; 2013;369:2515–24.
22. Paavola M, Malmivaara A, Taimela S, Kanto K, Inkinen J, Kalske J, et al. Subacromial decompression versus diagnostic arthroscopy for shoulder impingement: randomised, placebo surgery controlled clinical trial. *BMJ*. England; 2018;362:k2860.
23. Jarvinen TLN, Sihvonen R, Bhandari M, Sprague S, Malmivaara A, Paavola M, et al. Blinded interpretation of study results can feasibly and effectively diminish interpretation bias. *J Clin Epidemiol*. United States; 2014;67:769–72.
24. Rauhala M, Luoto TM, Huhtala H, Iverson GL, Niskakangas T, Öhman J, et al. The incidence of chronic subdural hematomas from 1990 to 2015 in a defined Finnish population. *J Neurosurg*. 2019;
25. Ducruet AF, Grobelny BT, Zacharia BE, Hickman ZL, Derosa PL, Anderson K, et al. The surgical management of chronic subdural hematoma. 2010 [cited 2019 Jun 28]; Available from: <https://link.springer.com/content/pdf/10.1007%2Fs10143-011-0349-y.pdf>
26. Bartek J, Sjøvik K, Kristiansson H, Ståhl F, Fornebo I, Förander P, et al. Predictors of Recurrence and Complications After Chronic Subdural Hematoma Surgery: A Population-Based Study. *World Neurosurg* [Internet]. Elsevier; 2017 [cited 2019 Apr 9];106:609–14. Available from: <https://www.sciencedirect.com/science/article/pii/S1878875017311440?via%3Dihub>
27. Bartley A, Jakola AS, Bartek J, Sundblom J, Förander P, Marklund N, et al. The Swedish study of Irrigation-fluid temperature in the evacuation of Chronic subdural hematoma (SIC!): study protocol for a multicenter randomized controlled trial. *Trials* [Internet]. BioMed Central; 2017 [cited 2019 Jun 28];18:471. Available from: <http://www.ncbi.nlm.nih.gov/pubmed/29021000>
28. Miah IP, Holl DC, Peul WC, Walchenbach R, Kruyt N, de Laat K, et al. Dexamethasone therapy versus surgery for chronic subdural haematoma (DECSA trial): study protocol for a randomised controlled trial. *Trials* [Internet]. BioMed Central; 2018 [cited 2019 Jun 28];19:575. Available from: <http://www.ncbi.nlm.nih.gov/pubmed/30342554>
29. Koliass AG, Edlmann E, Thelin EP, Bulters D, Holton P, Suttner N, et al. Dexamethasone for adult patients with a symptomatic chronic subdural haematoma (Dex-CSDH) trial: study protocol for a randomised controlled trial. *Trials* [Internet]. 2018 [cited 2020 Jan 18];19:670. Available from: <https://trialsjournal.biomedcentral.com/articles/10.1186/s13063-018-3050-4>
30. Iorio-Morin C, Blanchard J, Richer M, Mathieu D. Tranexamic Acid in Chronic Subdural Hematomas (TRACS): study protocol for a randomized controlled trial. *Trials* [Internet]. BioMed Central; 2016 [cited 2019 Jun 30];17:235. Available



1  
2  
3 from: <http://trialsjournal.biomedcentral.com/articles/10.1186/s13063-016-1358-5>  
4

## 5 **Footnotes**

6  
7  
8

9 **Trial sponsor:** Helsinki University Hospital  
10

11  
12 **Patient consent for publication:** Not required.  
13

14  
15  
16 **Provenance and peer review:** Not commissioned; externally peer reviewed.  
17

18  
19 **Data availability statement:** Anonymized data are available on reasonable request.  
20  
21

22  
23 **Acknowledgments:** We wish to thank the five EUPATI patient experts participating in the design of the  
24 study. Pihla Tommiska has received personal research grants from The Finnish Medical Foundation, Orion  
25 Research Foundation sr and Maire Taponen Foundation. Jussi Posti is funded by the Academy of Finland  
26 (grant #17379) and the Maire Taponen Foundation.  
27  
28  
29  
30  
31  
32  
33  
34  
35  
36  
37  
38  
39  
40  
41  
42  
43  
44  
45  
46  
47  
48  
49  
50  
51  
52  
53  
54  
55  
56  
57  
58  
59  
60

## Study administration structure

**Writing Committee:** Pihla Tommiska, Rahul Raj, Christoph Schwartz, Teemu Luostarinen, Jarno Satopää, Simo Taimela, Teppo Järvinen, Jussi Posti, Teemu Luoto, Ville Leinonen, Sami Tetri, Timo Koivisto and Kimmo Lönnrot

**Steering Committee:** Kimmo Lönnrot (chair), Riku Kivisaari (co-chair), Teemu Luostarinen (co-chair), Rahul Raj, Jussi Posti, Teemu Luoto, Ville Leinonen, Sami Tetri and Timo Koivisto

**Methods Centre:** Helsinki University Hospital: Rahul Raj (principal investigator), Jarno Satopää (co-principal investigator), Pihla Tommiska (co-principal investigator, data management), Maarit Tuomisto (research coordinator)

**Central Adjudication Committee:** Kimmo Lönnrot, Riku Kivisaari, Teemu Luostarinen, Rahul Raj, Jussi Posti, Teemu Luoto, Ville Leinonen, Sami Tetri and Timo Koivisto

**Data Safety Monitoring Board:** Martin Lehecka (MD, PhD, A. Prof, Helsinki University Hospital, Finland), Frederick A. Zeiler (MD, PhD, A. Prof, Rady Faculty of Health Sciences, University of Manitoba, Canada), Jiri Bartek Jr. (MD, Karolinska University Hospital, Stockholm, Sweden)

**Table 1:** Table of events

| Assessment                            | Baseline | Surgery | 48–72h | 6 weeks | 6 months |
|---------------------------------------|----------|---------|--------|---------|----------|
| Informed consent                      | X        |         |        |         |          |
| Randomisation                         |          | X       |        |         |          |
| Demographics                          | X        |         |        |         |          |
| Antithrombotic medication             | X        |         | X      | X       | X        |
| Neurological symptoms                 | X        |         | X      | X       | X        |
| Residence and mobility                | X        |         |        | X       | X        |
| Imaging                               | X        |         |        | X       |          |
| Surgical details                      |          | X       |        |         |          |
| Modified Rankin Scale                 | X        |         | X      | X       | X        |
| Survival status                       |          |         |        |         | X        |
| Need for ipsilateral CSDH reoperation |          |         |        |         | X        |
| Adverse events                        |          |         | X      | X       | X        |

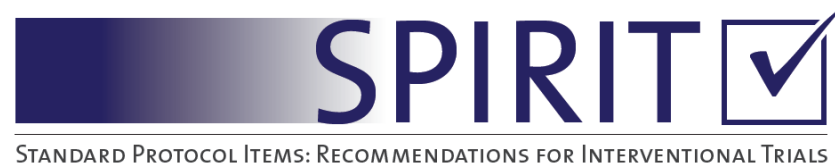

SPIRIT 2013 Checklist: Recommended items to address in a clinical trial protocol and related documents\*

| Section/item                      | Item No | Description                                                                                                                                                                                                                                                                              | Addressed on page number |
|-----------------------------------|---------|------------------------------------------------------------------------------------------------------------------------------------------------------------------------------------------------------------------------------------------------------------------------------------------|--------------------------|
| <b>Administrative information</b> |         |                                                                                                                                                                                                                                                                                          |                          |
| Title                             | 1       | Descriptive title identifying the study design, population, interventions, and, if applicable, trial acronym                                                                                                                                                                             | 1                        |
| Trial registration                | 2a      | Trial identifier and registry name. If not yet registered, name of intended registry                                                                                                                                                                                                     | 1                        |
|                                   | 2b      | All items from the World Health Organization Trial Registration Data Set                                                                                                                                                                                                                 | 4-6                      |
| Protocol version                  | 3       | Date and version identifier                                                                                                                                                                                                                                                              | footnote                 |
| Funding                           | 4       | Sources and types of financial, material, and other support                                                                                                                                                                                                                              | 20                       |
| Roles and responsibilities        | 5a      | Names, affiliations, and roles of protocol contributors                                                                                                                                                                                                                                  | 20                       |
|                                   | 5b      | Name and contact information for the trial sponsor                                                                                                                                                                                                                                       | 23                       |
|                                   | 5c      | Role of study sponsor and funders, if any, in study design; collection, management, analysis, and interpretation of data; writing of the report; and the decision to submit the report for publication, including whether they will have ultimate authority over any of these activities | 20, 23                   |
|                                   | 5d      | Composition, roles, and responsibilities of the coordinating centre, steering committee, endpoint adjudication committee, data management team, and other individuals or groups overseeing the trial, if applicable (see Item 21a for data monitoring committee)                         | 24                       |

|    |                                                           |     |                                                                                                               |         |
|----|-----------------------------------------------------------|-----|---------------------------------------------------------------------------------------------------------------|---------|
| 1  | <b>Introduction</b>                                       |     |                                                                                                               |         |
| 2  |                                                           |     |                                                                                                               |         |
| 3  | Background and                                            | 6a  | Description of research question and justification for undertaking the trial, including summary of relevant   | 6-7     |
| 4  | rationale                                                 |     | studies (published and unpublished) examining benefits and harms for each intervention                        |         |
| 5  |                                                           |     |                                                                                                               |         |
| 6  |                                                           | 6b  | Explanation for choice of comparators                                                                         | 6-7     |
| 7  |                                                           |     |                                                                                                               |         |
| 8  | Objectives                                                | 7   | Specific objectives or hypotheses                                                                             | 6-7     |
| 9  |                                                           |     |                                                                                                               |         |
| 10 | Trial design                                              | 8   | Description of trial design including type of trial (eg, parallel group, crossover, factorial, single group), |         |
| 11 |                                                           |     | allocation ratio, and framework (eg, superiority, equivalence, noninferiority, exploratory)                   | 6-7     |
| 12 |                                                           |     |                                                                                                               |         |
| 13 |                                                           |     |                                                                                                               |         |
| 14 | <b>Methods: Participants, interventions, and outcomes</b> |     |                                                                                                               |         |
| 15 |                                                           |     |                                                                                                               |         |
| 16 | Study setting                                             | 9   | Description of study settings (eg, community clinic, academic hospital) and list of countries where data will | 8       |
| 17 |                                                           |     | be collected. Reference to where list of study sites can be obtained                                          |         |
| 18 |                                                           |     |                                                                                                               |         |
| 19 | Eligibility criteria                                      | 10  | Inclusion and exclusion criteria for participants. If applicable, eligibility criteria for study centres and  | 8-9     |
| 20 |                                                           |     | individuals who will perform the interventions (eg, surgeons, psychotherapists)                               |         |
| 21 |                                                           |     |                                                                                                               |         |
| 22 | Interventions                                             | 11a | Interventions for each group with sufficient detail to allow replication, including how and when they will be | 10-11   |
| 23 |                                                           |     | administered                                                                                                  |         |
| 24 |                                                           |     |                                                                                                               |         |
| 25 |                                                           | 11b | Criteria for discontinuing or modifying allocated interventions for a given trial participant (eg, drug dose  | 12-13   |
| 26 |                                                           |     | change in response to harms, participant request, or improving/worsening disease)                             |         |
| 27 |                                                           |     |                                                                                                               |         |
| 28 |                                                           | 11c | Strategies to improve adherence to intervention protocols, and any procedures for monitoring adherence        | NA      |
| 29 |                                                           |     | (eg, drug tablet return, laboratory tests)                                                                    |         |
| 30 |                                                           |     |                                                                                                               |         |
| 31 |                                                           |     |                                                                                                               |         |
| 32 |                                                           | 11d | Relevant concomitant care and interventions that are permitted or prohibited during the trial                 | 10-11   |
| 33 |                                                           |     |                                                                                                               |         |
| 34 | Outcomes                                                  | 12  | Primary, secondary, and other outcomes, including the specific measurement variable (eg, systolic blood       |         |
| 35 |                                                           |     | pressure), analysis metric (eg, change from baseline, final value, time to event), method of aggregation (eg, | 13-14   |
| 36 |                                                           |     | median, proportion), and time point for each outcome. Explanation of the clinical relevance of chosen         |         |
| 37 |                                                           |     | efficacy and harm outcomes is strongly recommended                                                            |         |
| 38 |                                                           |     |                                                                                                               |         |
| 39 |                                                           |     |                                                                                                               |         |
| 40 | Participant timeline                                      | 13  | Time schedule of enrolment, interventions (including any run-ins and washouts), assessments, and visits for   | Table 1 |
| 41 |                                                           |     | participants. A schematic diagram is highly recommended (see Figure)                                          |         |
| 42 |                                                           |     |                                                                                                               |         |
| 43 |                                                           |     |                                                                                                               |         |
| 44 |                                                           |     |                                                                                                               |         |
| 45 |                                                           |     |                                                                                                               |         |
| 46 |                                                           |     |                                                                                                               |         |

|   |             |    |                                                                                                                                                                                       |       |
|---|-------------|----|---------------------------------------------------------------------------------------------------------------------------------------------------------------------------------------|-------|
| 1 | Sample size | 14 | Estimated number of participants needed to achieve study objectives and how it was determined, including clinical and statistical assumptions supporting any sample size calculations | 14-15 |
| 2 |             |    |                                                                                                                                                                                       |       |
| 3 |             |    |                                                                                                                                                                                       |       |
| 4 | Recruitment | 15 | Strategies for achieving adequate participant enrolment to reach target sample size                                                                                                   | 14-15 |
| 5 |             |    |                                                                                                                                                                                       |       |

## 6 **Methods: Assignment of interventions (for controlled trials)**

### 7 Allocation:

|    |                    |     |                                                                                                                                                                                                                                                                                                                                                          |    |
|----|--------------------|-----|----------------------------------------------------------------------------------------------------------------------------------------------------------------------------------------------------------------------------------------------------------------------------------------------------------------------------------------------------------|----|
| 8  |                    |     |                                                                                                                                                                                                                                                                                                                                                          |    |
| 9  |                    |     |                                                                                                                                                                                                                                                                                                                                                          |    |
| 10 | Sequence           | 16a | Method of generating the allocation sequence (eg, computer-generated random numbers), and list of any factors for stratification. To reduce predictability of a random sequence, details of any planned restriction (eg, blocking) should be provided in a separate document that is unavailable to those who enrol participants or assign interventions | 11 |
| 11 | generation         |     |                                                                                                                                                                                                                                                                                                                                                          |    |
| 12 |                    |     |                                                                                                                                                                                                                                                                                                                                                          |    |
| 13 |                    |     |                                                                                                                                                                                                                                                                                                                                                          |    |
| 14 |                    |     |                                                                                                                                                                                                                                                                                                                                                          |    |
| 15 |                    |     |                                                                                                                                                                                                                                                                                                                                                          |    |
| 16 | Allocation         | 16b | Mechanism of implementing the allocation sequence (eg, central telephone; sequentially numbered, opaque, sealed envelopes), describing any steps to conceal the sequence until interventions are assigned                                                                                                                                                | 11 |
| 17 | concealment        |     |                                                                                                                                                                                                                                                                                                                                                          |    |
| 18 | mechanism          |     |                                                                                                                                                                                                                                                                                                                                                          |    |
| 19 |                    |     |                                                                                                                                                                                                                                                                                                                                                          |    |
| 20 | Implementation     | 16c | Who will generate the allocation sequence, who will enrol participants, and who will assign participants to interventions                                                                                                                                                                                                                                | 11 |
| 21 |                    |     |                                                                                                                                                                                                                                                                                                                                                          |    |
| 22 |                    |     |                                                                                                                                                                                                                                                                                                                                                          |    |
| 23 |                    |     |                                                                                                                                                                                                                                                                                                                                                          |    |
| 24 | Blinding (masking) | 17a | Who will be blinded after assignment to interventions (eg, trial participants, care providers, outcome assessors, data analysts), and how                                                                                                                                                                                                                | 12 |
| 25 |                    |     |                                                                                                                                                                                                                                                                                                                                                          |    |
| 26 |                    |     |                                                                                                                                                                                                                                                                                                                                                          |    |
| 27 |                    | 17b | If blinded, circumstances under which unblinding is permissible, and procedure for revealing a participant's allocated intervention during the trial                                                                                                                                                                                                     | 12 |
| 28 |                    |     |                                                                                                                                                                                                                                                                                                                                                          |    |
| 29 |                    |     |                                                                                                                                                                                                                                                                                                                                                          |    |
| 30 |                    |     |                                                                                                                                                                                                                                                                                                                                                          |    |

## 31 **Methods: Data collection, management, and analysis**

|    |                 |     |                                                                                                                                                                                                                                                                                                                                                                                                              |       |
|----|-----------------|-----|--------------------------------------------------------------------------------------------------------------------------------------------------------------------------------------------------------------------------------------------------------------------------------------------------------------------------------------------------------------------------------------------------------------|-------|
| 32 |                 |     |                                                                                                                                                                                                                                                                                                                                                                                                              |       |
| 33 | Data collection | 18a | Plans for assessment and collection of outcome, baseline, and other trial data, including any related processes to promote data quality (eg, duplicate measurements, training of assessors) and a description of study instruments (eg, questionnaires, laboratory tests) along with their reliability and validity, if known. Reference to where data collection forms can be found, if not in the protocol | 13-14 |
| 34 | methods         |     |                                                                                                                                                                                                                                                                                                                                                                                                              |       |
| 35 |                 |     |                                                                                                                                                                                                                                                                                                                                                                                                              |       |
| 36 |                 |     |                                                                                                                                                                                                                                                                                                                                                                                                              |       |
| 37 |                 |     |                                                                                                                                                                                                                                                                                                                                                                                                              |       |
| 38 |                 | 18b | Plans to promote participant retention and complete follow-up, including list of any outcome data to be collected for participants who discontinue or deviate from intervention protocols                                                                                                                                                                                                                    | 13-14 |
| 39 |                 |     |                                                                                                                                                                                                                                                                                                                                                                                                              |       |
| 40 |                 |     |                                                                                                                                                                                                                                                                                                                                                                                                              |       |
| 41 |                 |     |                                                                                                                                                                                                                                                                                                                                                                                                              |       |
| 42 |                 |     |                                                                                                                                                                                                                                                                                                                                                                                                              |       |

1 Data management 19 Plans for data entry, coding, security, and storage, including any related processes to promote data quality 15  
 2 (eg, double data entry; range checks for data values). Reference to where details of data management  
 3 procedures can be found, if not in the protocol  
 4  
 5 Statistical methods 20a Statistical methods for analysing primary and secondary outcomes. Reference to where other details of the 15-16  
 6 statistical analysis plan can be found, if not in the protocol  
 7  
 8 20b Methods for any additional analyses (eg, subgroup and adjusted analyses) 15-16  
 9  
 10 20c Definition of analysis population relating to protocol non-adherence (eg, as randomised analysis), and any  
 11 statistical methods to handle missing data (eg, multiple imputation) 12, 15-16  
 12  
 13  
 14 **Methods: Monitoring**  
 15  
 16 Data monitoring 21a Composition of data monitoring committee (DMC); summary of its role and reporting structure; statement of 17, 24  
 17 whether it is independent from the sponsor and competing interests; and reference to where further details  
 18 about its charter can be found, if not in the protocol. Alternatively, an explanation of why a DMC is not  
 19 needed  
 20  
 21 21b Description of any interim analyses and stopping guidelines, including who will have access to these interim 17  
 22 results and make the final decision to terminate the trial  
 23  
 24  
 25 Harms 22 Plans for collecting, assessing, reporting, and managing solicited and spontaneously reported adverse 13-14  
 26 events and other unintended effects of trial interventions or trial conduct  
 27  
 28 Auditing 23 Frequency and procedures for auditing trial conduct, if any, and whether the process will be independent 17  
 29 from investigators and the sponsor  
 30  
 31  
 32 **Ethics and dissemination**  
 33  
 34 Research ethics 24 Plans for seeking research ethics committee/institutional review board (REC/IRB) approval 17  
 35 approval  
 36  
 37 Protocol 25 Plans for communicating important protocol modifications (eg, changes to eligibility criteria, outcomes, 17-18  
 38 amendments analyses) to relevant parties (eg, investigators, REC/IRBs, trial participants, trial registries, journals,  
 39 regulators)  
 40  
 41  
 42  
 43  
 44  
 45  
 46

|    |                               |     |                                                                                                                                                                                                                                                                                     |        |
|----|-------------------------------|-----|-------------------------------------------------------------------------------------------------------------------------------------------------------------------------------------------------------------------------------------------------------------------------------------|--------|
| 1  | Consent or assent             | 26a | Who will obtain informed consent or assent from potential trial participants or authorised surrogates, and how (see Item 32)                                                                                                                                                        | 9-10   |
| 2  |                               |     |                                                                                                                                                                                                                                                                                     |        |
| 3  |                               |     |                                                                                                                                                                                                                                                                                     |        |
| 4  |                               | 26b | Additional consent provisions for collection and use of participant data and biological specimens in ancillary studies, if applicable                                                                                                                                               | 10     |
| 5  |                               |     |                                                                                                                                                                                                                                                                                     |        |
| 6  |                               |     |                                                                                                                                                                                                                                                                                     |        |
| 7  | Confidentiality               | 27  | How personal information about potential and enrolled participants will be collected, shared, and maintained in order to protect confidentiality before, during, and after the trial                                                                                                | 10, 15 |
| 8  |                               |     |                                                                                                                                                                                                                                                                                     |        |
| 9  |                               |     |                                                                                                                                                                                                                                                                                     |        |
| 10 | Declaration of interests      | 28  | Financial and other competing interests for principal investigators for the overall trial and each study site                                                                                                                                                                       | 20, 23 |
| 11 |                               |     |                                                                                                                                                                                                                                                                                     |        |
| 12 |                               |     |                                                                                                                                                                                                                                                                                     |        |
| 13 | Access to data                | 29  | Statement of who will have access to the final trial dataset, and disclosure of contractual agreements that limit such access for investigators                                                                                                                                     | NA     |
| 14 |                               |     |                                                                                                                                                                                                                                                                                     |        |
| 15 |                               |     |                                                                                                                                                                                                                                                                                     |        |
| 16 | Ancillary and post-trial care | 30  | Provisions, if any, for ancillary and post-trial care, and for compensation to those who suffer harm from trial participation                                                                                                                                                       | NA     |
| 17 |                               |     |                                                                                                                                                                                                                                                                                     |        |
| 18 |                               |     |                                                                                                                                                                                                                                                                                     |        |
| 19 |                               |     |                                                                                                                                                                                                                                                                                     |        |
| 20 | Dissemination policy          | 31a | Plans for investigators and sponsor to communicate trial results to participants, healthcare professionals, the public, and other relevant groups (eg, via publication, reporting in results databases, or other data sharing arrangements), including any publication restrictions | 19     |
| 21 |                               |     |                                                                                                                                                                                                                                                                                     |        |
| 22 |                               |     |                                                                                                                                                                                                                                                                                     |        |
| 23 |                               |     |                                                                                                                                                                                                                                                                                     |        |
| 24 |                               | 31b | Authorship eligibility guidelines and any intended use of professional writers                                                                                                                                                                                                      | 17-18  |
| 25 |                               |     |                                                                                                                                                                                                                                                                                     |        |
| 26 |                               | 31c | Plans, if any, for granting public access to the full protocol, participant-level dataset, and statistical code                                                                                                                                                                     | 23     |
| 27 |                               |     |                                                                                                                                                                                                                                                                                     |        |
| 28 |                               |     |                                                                                                                                                                                                                                                                                     |        |
| 29 | <b>Appendices</b>             |     |                                                                                                                                                                                                                                                                                     |        |
| 30 |                               |     |                                                                                                                                                                                                                                                                                     |        |
| 31 | Informed consent materials    | 32  | Model consent form and other related documentation given to participants and authorised surrogates                                                                                                                                                                                  | NA     |
| 32 |                               |     |                                                                                                                                                                                                                                                                                     |        |
| 33 |                               |     |                                                                                                                                                                                                                                                                                     |        |
| 34 | Biological specimens          | 33  | Plans for collection, laboratory evaluation, and storage of biological specimens for genetic or molecular analysis in the current trial and for future use in ancillary studies, if applicable                                                                                      | 10     |
| 35 |                               |     |                                                                                                                                                                                                                                                                                     |        |
| 36 |                               |     |                                                                                                                                                                                                                                                                                     |        |

\*It is strongly recommended that this checklist be read in conjunction with the SPIRIT 2013 Explanation & Elaboration for important clarification on the items. Amendments to the protocol should be tracked and dated. The SPIRIT checklist is copyrighted by the SPIRIT Group under the Creative Commons [“Attribution-NonCommercial-NoDerivs 3.0 Unported”](https://creativecommons.org/licenses/by-nc-nd/3.0/) license.



**Additional File 2:** Summary of the FINISH trial protocol

| Data category                                 | Information                                                                                                                                                                                                                                                                                                                                                                                                                                                                                                                                                                                              |
|-----------------------------------------------|----------------------------------------------------------------------------------------------------------------------------------------------------------------------------------------------------------------------------------------------------------------------------------------------------------------------------------------------------------------------------------------------------------------------------------------------------------------------------------------------------------------------------------------------------------------------------------------------------------|
| Primary registry and trial identifying number | ClinicalTrials.gov<br>NCT04203550                                                                                                                                                                                                                                                                                                                                                                                                                                                                                                                                                                        |
| Date of registration in primary registry      | December 18, 2019                                                                                                                                                                                                                                                                                                                                                                                                                                                                                                                                                                                        |
| Secondary identifying numbers                 | N/A                                                                                                                                                                                                                                                                                                                                                                                                                                                                                                                                                                                                      |
| Source(s) of monetary or material support     | State funding for University-level health research (Helsinki University Hospitals), Finska Läkaresällskapet, Medicinska Understödsföreningen Liv & Hälsa                                                                                                                                                                                                                                                                                                                                                                                                                                                 |
| Primary sponsor                               | Helsinki University Hospital                                                                                                                                                                                                                                                                                                                                                                                                                                                                                                                                                                             |
| Secondary sponsor(s)                          | N/A                                                                                                                                                                                                                                                                                                                                                                                                                                                                                                                                                                                                      |
| Contact for public queries                    | Kimmo Lönnrot, MD, PhD; email: <i>kimmo.lonnrot@hus.fi</i> ; address: Töölö Hospital, Topeliuksenkatu 5, PB 266, 00029 HUS, Finland; phone: +358-50-427-0270                                                                                                                                                                                                                                                                                                                                                                                                                                             |
| Contact for scientific queries                | Kimmo Lönnrot, MD, PhD; email: <i>kimmo.lonnrot@hus.fi</i> ; address: Töölö Hospital, Topeliuksenkatu 5, PB 266, 00029 HUS, Finland; phone: +358-50-427-0270                                                                                                                                                                                                                                                                                                                                                                                                                                             |
| Public title                                  | Irrigation or no irrigation for surgery of chronic subdural haematoma (FINISH)                                                                                                                                                                                                                                                                                                                                                                                                                                                                                                                           |
| Scientific title                              | The Finnish study of Intraoperative Irrigation versus drain alone after evacuation of chronic Subdural Haematoma (FINISH): A study protocol for a multicentre randomised controlled trial                                                                                                                                                                                                                                                                                                                                                                                                                |
| Countries of recruitment                      | Finland                                                                                                                                                                                                                                                                                                                                                                                                                                                                                                                                                                                                  |
| Health condition(s) or problem(s) studied     | Chronic subdural haematoma (CSDH)                                                                                                                                                                                                                                                                                                                                                                                                                                                                                                                                                                        |
| Intervention(s)                               | <p>Active comparator: Irrigation (i.e. the subdural space is irrigated by repeated rinsing with body temperature saline solution with a syringe and blunt needle until surgeon considers exudate to be clear. The minimum volume of irrigation is 200 ml per operated side. A subdural drain is inserted 3–5 cm underneath the skull and parallel to it and kept as a passive drain for 48 hours)</p> <p>Experimental: No irrigation (i.e. after a small incision of the dura, a subdural drain is inserted 3–5 cm underneath the skull and parallel to it and kept as a passive drain for 48 hours)</p> |

**Additional File 2:** Summary of the FINISH trial protocol

| Data category                        | Information                                                                                                                                                                                                                                                                                                                                                                                                                                                                                                                                                                                                                                                                                                                                                                                                                                                                                                                                                                                                                                                                                                                                                                                                                                                                                                                                                                                                                                                                                                                                                                                                                                                                                                                                     |
|--------------------------------------|-------------------------------------------------------------------------------------------------------------------------------------------------------------------------------------------------------------------------------------------------------------------------------------------------------------------------------------------------------------------------------------------------------------------------------------------------------------------------------------------------------------------------------------------------------------------------------------------------------------------------------------------------------------------------------------------------------------------------------------------------------------------------------------------------------------------------------------------------------------------------------------------------------------------------------------------------------------------------------------------------------------------------------------------------------------------------------------------------------------------------------------------------------------------------------------------------------------------------------------------------------------------------------------------------------------------------------------------------------------------------------------------------------------------------------------------------------------------------------------------------------------------------------------------------------------------------------------------------------------------------------------------------------------------------------------------------------------------------------------------------|
| Key inclusion and exclusion criteria | <p>Ages eligible for study: <math>\geq 18</math> years<br/> Sexes eligible for study: All<br/> Accepts healthy volunteers: No</p> <p>Inclusion criteria:</p> <ul style="list-style-type: none"> <li>- Patients with a symptomatic unilateral or bilateral CSDH requiring burr-hole evacuation</li> <li>- Predominantly hypodense or isodense on imaging (CT/MRI)</li> <li>- Clinical symptoms correlating with CSDH</li> <li>- Patients with bilaterally operated CSDHs will be treated with the same protocol on both sides and analysed as a single study participant</li> </ul> <p>Exclusion criteria:</p> <ul style="list-style-type: none"> <li>- CSDH requiring surgical treatment other than burr-hole evacuation (e.g. craniotomy)</li> <li>- CSDH in a patient who has a cerebrospinal fluid shunt</li> <li>- Patients who have previously undergone any intracranial surgery</li> <li>- Comatose patients (GCS 8 or lower) with absent motor responses to painful stimuli; decerebrate or decorticate posturing</li> <li>- Patient's postoperative cooperation is suspected to be insufficient for drain usage (i.e. disoriented or semiconscious patient)</li> <li>- Patient has a haematogenic malignancy that has been actively treated within the previous five years</li> <li>- Patient has a central nervous system tumour or malignancy</li> <li>- Patient has an acute infection requiring antibiotic treatment</li> <li>- Patient has a high risk of life-threatening thrombosis (e.g. recent coronary stent, intracranial stent, recent pulmonary embolism, low pressure cardiac valve replacement [mitral- or tricuspid valve replacement]) and discontinuation of antithrombotic medication is not recommended</li> </ul> |
| Study type                           | <p>Prospective, randomised, controlled, parallel group, non-inferiority trial</p> <p>Allocation: Randomised</p> <p>Intervention model: Parallel assignment</p> <p>Intervention model description: Prospective, randomised, controlled, parallel group, non-inferiority trial</p> <p>Masking: Quadruple (participant, care provider, investigator, outcomes assessor)</p> <p>Primary purpose: Treatment</p>                                                                                                                                                                                                                                                                                                                                                                                                                                                                                                                                                                                                                                                                                                                                                                                                                                                                                                                                                                                                                                                                                                                                                                                                                                                                                                                                      |
| Date of first enrolment              | January 2020                                                                                                                                                                                                                                                                                                                                                                                                                                                                                                                                                                                                                                                                                                                                                                                                                                                                                                                                                                                                                                                                                                                                                                                                                                                                                                                                                                                                                                                                                                                                                                                                                                                                                                                                    |

**Additional File 2:** Summary of the FINISH trial protocol

| <b>Data category</b>   | <b>Information</b>                                                                                                                                                                                                                                      |
|------------------------|---------------------------------------------------------------------------------------------------------------------------------------------------------------------------------------------------------------------------------------------------------|
| Target sample size     | 540 participants                                                                                                                                                                                                                                        |
| Recruitment status     | Recruiting                                                                                                                                                                                                                                              |
| Primary outcome(s)     | Rate of reoperations of ipsilateral chronic subdural hematoma (time frame: 6 months from randomization)                                                                                                                                                 |
| Key secondary outcomes | Change of Modified Rankin Scale (time frame: 6 months), rate of mortality (time frame: 6 months), duration of operation, hospital length of stay, rate of adverse events (time frame: 6 months), change in volume of CSDH between baseline and 2 months |
