# Supplementary material for: Finnish study of intraoperative irrigation versus drain alone after evacuation of chronic subdural haematoma (FINISH): a study protocol for a multicentre randomised controlled trial
Source: PubMed Central journal article supplement — BMJ Open. 2020 Jun 21;10(6):e038275. doi: 10.1136/bmjopen-2020-038275 (PMC7311024; doi:10.1136/bmjopen-2020-038275), 2020-06-21
Supplement: bmjopen-2020-038275supp001.pdf [file bmjopen-2020-038275supp001.pdf]

**Additional File 2: Summary of the FINISH trial protocol**

| <b>Data category</b>                          | <b>Information</b>                                                                                                                                                                                                                                                                                                                                                                                                                                                                                                                                                                                       |
|-----------------------------------------------|----------------------------------------------------------------------------------------------------------------------------------------------------------------------------------------------------------------------------------------------------------------------------------------------------------------------------------------------------------------------------------------------------------------------------------------------------------------------------------------------------------------------------------------------------------------------------------------------------------|
| Primary registry and trial identifying number | ClinicalTrials.gov<br>NCT04203550                                                                                                                                                                                                                                                                                                                                                                                                                                                                                                                                                                        |
| Date of registration in primary registry      | December 18, 2019                                                                                                                                                                                                                                                                                                                                                                                                                                                                                                                                                                                        |
| Secondary identifying numbers                 | N/A                                                                                                                                                                                                                                                                                                                                                                                                                                                                                                                                                                                                      |
| Source(s) of monetary or material support     | State funding for University-level health research (Helsinki University Hospitals), Finska Läkaresällskapet, Medicinska Understödsföreningen Liv & Hälsa                                                                                                                                                                                                                                                                                                                                                                                                                                                 |
| Primary sponsor                               | Helsinki University Hospital                                                                                                                                                                                                                                                                                                                                                                                                                                                                                                                                                                             |
| Secondary sponsor(s)                          | N/A                                                                                                                                                                                                                                                                                                                                                                                                                                                                                                                                                                                                      |
| Contact for public queries                    | Kimmo Lönnrot, MD, PhD; email: <a href="mailto:kimmo.lonnrot@hus.fi">kimmo.lonnrot@hus.fi</a> ; address: Töölö Hospital, Topeliuksenkatu 5, PB 266, 00029 HUS, Finland; phone: +358-50-427-0270                                                                                                                                                                                                                                                                                                                                                                                                          |
| Contact for scientific queries                | Kimmo Lönnrot, MD, PhD; email: <a href="mailto:kimmo.lonnrot@hus.fi">kimmo.lonnrot@hus.fi</a> ; address: Töölö Hospital, Topeliuksenkatu 5, PB 266, 00029 HUS, Finland; phone: +358-50-427-0270                                                                                                                                                                                                                                                                                                                                                                                                          |
| Public title                                  | Irrigation or no irrigation for surgery of chronic subdural haematoma (FINISH)                                                                                                                                                                                                                                                                                                                                                                                                                                                                                                                           |
| Scientific title                              | The Finnish study of Intraoperative Irrigation versus drain alone after evacuation of chronic Subdural Haematoma (FINISH): A study protocol for a multicentre randomised controlled trial                                                                                                                                                                                                                                                                                                                                                                                                                |
| Countries of recruitment                      | Finland                                                                                                                                                                                                                                                                                                                                                                                                                                                                                                                                                                                                  |
| Health condition(s) or problem(s) studied     | Chronic subdural haematoma (CSDH)                                                                                                                                                                                                                                                                                                                                                                                                                                                                                                                                                                        |
| Intervention(s)                               | <p>Active comparator: Irrigation (i.e. the subdural space is irrigated by repeated rinsing with body temperature saline solution with a syringe and blunt needle until surgeon considers exudate to be clear. The minimum volume of irrigation is 200 ml per operated side. A subdural drain is inserted 3–5 cm underneath the skull and parallel to it and kept as a passive drain for 48 hours)</p> <p>Experimental: No irrigation (i.e. after a small incision of the dura, a subdural drain is inserted 3–5 cm underneath the skull and parallel to it and kept as a passive drain for 48 hours)</p> |

**Additional File 2: Summary of the FINISH trial protocol**

| <b>Data category</b>                 | <b>Information</b>                                                                                                                                                                                                                                                                                                                                                                                                                                                                                                                                                                                                                                                                                                                                                                                                                                                                                                                                                                                                                                                                                                                                                                                                                                                                                                                                                                                                                                                                                                                                                                                                                                                                                                             |
|--------------------------------------|--------------------------------------------------------------------------------------------------------------------------------------------------------------------------------------------------------------------------------------------------------------------------------------------------------------------------------------------------------------------------------------------------------------------------------------------------------------------------------------------------------------------------------------------------------------------------------------------------------------------------------------------------------------------------------------------------------------------------------------------------------------------------------------------------------------------------------------------------------------------------------------------------------------------------------------------------------------------------------------------------------------------------------------------------------------------------------------------------------------------------------------------------------------------------------------------------------------------------------------------------------------------------------------------------------------------------------------------------------------------------------------------------------------------------------------------------------------------------------------------------------------------------------------------------------------------------------------------------------------------------------------------------------------------------------------------------------------------------------|
| Key inclusion and exclusion criteria | <p>Ages eligible for study: ≥18 years<br/> Sexes eligible for study: All<br/> Accepts healthy volunteers: No</p> <p>Inclusion criteria:</p> <ul style="list-style-type: none"> <li>- Patients with a symptomatic unilateral or bilateral CSDH requiring burr-hole evacuation</li> <li>- Predominantly hypodense or isodense on imaging (CT/MRI)</li> <li>- Clinical symptoms correlating with CSDH</li> <li>- Patients with bilaterally operated CSDHs will be treated with the same protocol on both sides and analysed as a single study participant</li> </ul> <p>Exclusion criteria:</p> <ul style="list-style-type: none"> <li>- CSDH requiring surgical treatment other than burr-hole evacuation (e.g. craniotomy)</li> <li>- CSDH in a patient who has a cerebrospinal fluid shunt</li> <li>- Patients who have previously undergone any intracranial surgery</li> <li>- Comatose patients (GCS 8 or lower) with absent motor responses to painful stimuli; decerebrate or decorticate posturing</li> <li>- Patient's postoperative cooperation is suspected to be insufficient for drain usage (i.e. disoriented or semiconscious patient)</li> <li>- Patient has a haematogenic malignancy that has been actively treated within the previous five years</li> <li>- Patient has a central nervous system tumour or malignancy</li> <li>- Patient has an acute infection requiring antibiotic treatment</li> <li>- Patient has a high risk of life-threatening thrombosis (e.g. recent coronary stent, intracranial stent, recent pulmonary embolism, low pressure cardiac valve replacement [mitral- or tricuspid valve replacement]) and discontinuation of antithrombotic medication is not recommended</li> </ul> |
| Study type                           | <p>Prospective, randomised, controlled, parallel group, non-inferiority trial</p> <p>Allocation: Randomised</p> <p>Intervention model: Parallel assignment</p> <p>Intervention model description: Prospective, randomised, controlled, parallel group, non-inferiority trial</p> <p>Masking: Quadruple (participant, care provider, investigator, outcomes assessor)</p> <p>Primary purpose: Treatment</p>                                                                                                                                                                                                                                                                                                                                                                                                                                                                                                                                                                                                                                                                                                                                                                                                                                                                                                                                                                                                                                                                                                                                                                                                                                                                                                                     |
| Date of first enrolment              | January 2020                                                                                                                                                                                                                                                                                                                                                                                                                                                                                                                                                                                                                                                                                                                                                                                                                                                                                                                                                                                                                                                                                                                                                                                                                                                                                                                                                                                                                                                                                                                                                                                                                                                                                                                   |

**Additional File 2:** Summary of the FINISH trial protocol

| <b>Data category</b>   | <b>Information</b>                                                                                                                                                                                                                                      |
|------------------------|---------------------------------------------------------------------------------------------------------------------------------------------------------------------------------------------------------------------------------------------------------|
| Target sample size     | 540 participants                                                                                                                                                                                                                                        |
| Recruitment status     | Recruiting                                                                                                                                                                                                                                              |
| Primary outcome(s)     | Rate of reoperations of ipsilateral chronic subdural hematoma (time frame: 6 months from randomization)                                                                                                                                                 |
| Key secondary outcomes | Change of Modified Rankin Scale (time frame: 6 months), rate of mortality (time frame: 6 months), duration of operation, hospital length of stay, rate of adverse events (time frame: 6 months), change in volume of CSDH between baseline and 2 months |
